# Supplementary material
Source: publisher figshare collection journal article supplement (https://acs.figshare.com/ndownloader/files/31803726)
Supplement: Supplementary file 1 [file 31803726]

## SUPPORTING INFORMATION

for

Drivers of Disinfection Byproduct Cytotoxicity in U.S. Drinking Water: Should Other DBPs Be Considered for Regulation?

Joshua M. Allen<sup>1a</sup>, Michael J. Plewa<sup>2,3</sup>, Elizabeth D. Wagner<sup>2,3</sup>, Xiao Wei<sup>2,3,5</sup>, Katherine Bokenkamp<sup>2,3</sup>, Kyu Hur<sup>2,3,b</sup>, Ai Jia<sup>4</sup>, Hannah K. Liberatore<sup>1,c</sup>, Chih-Fen T. Lee<sup>4</sup>, Raha Shirkhani<sup>4</sup>, Stuart W. Krasner<sup>4</sup>, and Susan D. Richardson<sup>1,\*</sup>

<sup>1</sup>Department of Chemistry and Biochemistry, University of South Carolina, Columbia, South Carolina 29208, United States

<sup>2</sup>Department of Crop Sciences, University of Illinois at Urbana-Champaign, Urbana, Illinois 61801, United States

<sup>3</sup>Safe Global Water Institute, University of Illinois at Urbana-Champaign, Urbana, Illinois 61801, United States

<sup>4</sup>Metropolitan Water District of Southern California, Water Quality Laboratory, La Verne, California 91750, United States

<sup>5</sup>Department of Occupational and Environmental Health, School of Public Health, Guangxi Medical University, Nanning, Guangxi 530021, China

<sup>a</sup>Currently at LanzaTech, 535 Commerce Drive, Soperton, Georgia 30457, United States

<sup>b</sup>Currently at the Department of Human Ecology, Graduate School of Medicine, The University of Tokyo, 7-3-1 Hongo, Bunkyo-ku, Tokyo 113-0033, Japan

<sup>c</sup>Currently at the Center for Computational Toxicology and Exposure, Office of Research and Development, U.S. Environmental Protection Agency, Research Triangle Park, North Carolina 27711, United States

\*E-mail: [richardson.susan@sc.edu](mailto:richardson.susan@sc.edu); Phone: 803-777-6932

**Total pages: 49**

**Total number of tables: 29**

**Total number of figures: 18**

## TABLE OF CONTENTS

|                                                                                                                                                                                                                                 |     |
|---------------------------------------------------------------------------------------------------------------------------------------------------------------------------------------------------------------------------------|-----|
| Text S1 – Unregulated disinfection by-product (DBP) extraction procedure .....                                                                                                                                                  | S3  |
| Text S2 – Total organic halogen (TOX) extraction procedure .....                                                                                                                                                                | S3  |
| Text S3 – Chinese Hamster Ovary (CHO) cell chronic cytotoxicity assay .....                                                                                                                                                     | S4  |
| Literature cited .....                                                                                                                                                                                                          | S5  |
| Figure S1 – Total organic halogen data for all plants (distribution system/average). .....                                                                                                                                      | S7  |
| Figures S2-S17 - Cytotoxicity concentration-response curves .....                                                                                                                                                               | S8  |
| Figure S18 – Raw vs. distribution system average cytotoxicity index values .....                                                                                                                                                | S16 |
| Table S1 – Summary of analytical methods .....                                                                                                                                                                                  | S17 |
| Table S2 – CHO cell cytotoxicity data for all plants .....                                                                                                                                                                      | S18 |
| Table S3 – Table S3. Pearson Product Moment Correlation statistical analyses for<br>DBP and CHO cell cytotoxicity .....                                                                                                         | S19 |
| Table S4 – Summary of chemical doses applied for each plant .....                                                                                                                                                               | S19 |
| Tables S5-S28 – Mean concentrations ( $\mu\text{g/L}$ and $\text{nM}$ ) of regulated and unregulated<br>DBPs, mean TOX concentrations ( $\mu\text{g/L}$ and $\text{nM}$ ), and water quality parameters<br>for each plant ..... | S21 |
| Table S29 – Summary of the CHO cell cytotoxicity statistical analyses of<br>distribution average water samples .....                                                                                                            | S49 |

**Text S1. Unregulated disinfection by-product extraction procedure**

Raw (untreated) and distribution system at average detention (Dist. Avg.) samples were extracted in duplicate. The 53 priority, unregulated haloacetonitriles (HANs), haloacetamides (HAMs), halonitromethanes (HNMs), iodinated trihalomethanes (I-THMs), iodinated haloacetic acids (I-HAAs), haloketones (HKs), and tri-haloacetaldehydes (tri-HALs) were extracted in a single method.<sup>1-5</sup> For this procedure, 100 mL samples were adjusted to pH < 1.0 with concentrated H<sub>2</sub>SO<sub>4</sub>, spiked with 30 g of sodium sulfate and 5 mL of methyl *tert*-butyl ether (MTBE), and shaken for 15 min on a mechanical shaker. This was done three times, with a 10-minute wait in between each shake for phase separation before removing the organic layer into a separate container. After passing the 15 mL of final extract over dried Na<sub>2</sub>SO<sub>4</sub> to remove excess water, the extract was concentrated under nitrogen to a final volume of 200 µL and spiked with internal standard (1,2-dibromopropane). Half of this extract was used for analysis of HANs, HAMs, HNMs, I-THMs, IAAs, HKs, and tri-HALs, and the second 100 µL extract underwent diazomethane derivatization for analysis of the four I-HAAs.

**Text S2. Total organic halogen procedure**

First, 50 mL of sample was adjusted to pH 2 with concentrated HNO<sub>3</sub> and passed through two activated carbon (AC) columns, then the columns were washed with 10 mL of 5,000 mg/L of KNO<sub>3</sub> adjusted to pH 2. Each AC was then loaded onto a ceramic boat and automatically loaded into a quick furnace (AQF-2100H) using an automatic solid sampler (ASC-240S). The ACs were pyrolyzed inside the furnace at 1000°C, and the produced gasses were bubbled into centrifuge tubes that contained 5 mL of adsorption solution (0.003% H<sub>2</sub>O<sub>2</sub>, 0.01 mM phosphate) using a gas absorption unit (AU-250). The

adsorption solution was analyzed for chloride, bromide, and iodide with a 1600 ion chromatography (IC) system (Dionex, Sunnyvale, CA). For low iodide concentrations ( $<10\text{ }\mu\text{g/L}$ ), a Finnigan ELEMENT XR double focusing magnetic sector field ICP-MS instrument (Thermo Electron Corporation) instrument was used for quantification.<sup>4,6</sup>

### **Text S3. Chinese Hamster Ovary (CHO) cell chronic cytotoxicity assay**

After XAD ethyl acetate extracts were solvent-exchanged into dimethyl sulfoxide (DMSO), a 96-well flat-bottomed microplate was used to evaluate a series of concentrations of the concentrated water sample (CWS) for each experimental group. One column of eight microplate wells served as the blank control consisting of 200  $\mu\text{L}$  of F12 + 5% fetal bovine serum (FBS) medium only. The concurrent negative control column consisted of wells with  $3\times 10^3$  CHO cells plus F12 + FBS medium. The remaining wells within the experiment contained  $3\times 10^3$  CHO cells, F12 + FBS and a known volume of the CWS for a total of 200  $\mu\text{L}$ . The wells were covered with a sheet of sterile Alumna Seal™ to prevent volatile cross contamination of adjacent wells. The microplate was placed on a rocking platform at 37°C for two 5 min-periods (turning the plate 90° after the first 5 min). This step is important to ensure an even distribution of cells across the bottom of the microplate wells. The cells were incubated for 72 h at 37°C under 5%  $\text{CO}_2$ .

After the treatment time, the medium from each well was aspirated, the cells fixed in methanol for 5 min and stained for 10 min with a 1% crystal violet solution in 50% methanol. The microplate was washed in tap water and patted dry and 50  $\mu\text{L}$  of dimethyl sulfoxide (DMSO)/methanol (3:1 v/v) was added to each well; the plate was incubated at room temperature for 10 min. The microplate was analyzed at 595 nm with a SpectraMax™ microplate reader. This assay was calibrated and there was a direct

relationship between the absorbance of the crystal violet dye associated with cell density and the number of viable cells.<sup>7</sup> The averaged absorbance of the blank wells was subtracted from the absorbance data from each microplate well. The mean blank-corrected absorbance value of the negative control was set at 100%. The absorbance for each treatment group well was converted into a percentage of the negative control. This procedure normalized the data, maintained the variance and allowed the combination of data from multiple microplates. For each experiment, a series of concentrations (generally 10 concentration factors) are constructed by diluting the DMSO concentrate, and then mixed with culture medium just prior to the experiment. A median lethal concentration ( $LC_{50}$ )  $\pm$  standard error (SE) value could be generated, which is the concentration of the water sample, determined from a bootstrap multiple regression analysis of the data,<sup>8–11</sup> that induced a cell density of 50% as compared to the concurrent negative control. A cytotoxicity index (CTI) could then be found using the  $LC_{50}$ , which is defined as the  $LC_{50}^{-1}(10^3)$ , such that cytotoxic potency could be easily ranked (higher CTI, higher cytotoxicity).

## Literature Cited

- (1) Cuthbertson, A. A.; Liberatore, H. K.; Kimura, S. Y.; Allen, J. M.; Bensussan, A. V.; Richardson, S. D. Trace Analysis of 61 Emerging Br-, Cl-, and I-DBPs: New Methods to Achieve Part-Per-Trillion Quantification in Drinking Water. *Anal. Chem.* **2020**, 92, 3058–3068.
- (2) Cuthbertson, A. A.; Kimura, S. Y.; Liberatore, H. K.; Summers, R. S.; Knappe, D. R. U. U.; Stanford, B. D.; Maness, J. C.; Mulhern, R. E.; Selbes, M.; Richardson, S. D. Does Granular Activated Carbon with Chlorination Produce Safer Drinking Water? From Disinfection Byproducts and Total Organic Halogen to Calculated Toxicity. *Environ. Sci. Technol.* **2019**, 53, 5987–5999.
- (3) Cuthbertson, A. A.; Kimura, S. Y.; Liberatore, H. K.; Knappe, D. R. U.; Stanford, B.; Summers, R. S.; Dickenson, E. R.; Maness, J. C.; Glover, C.; Selbes, M.; Richardson, S. D. GAC to BAC: Does It Make Chloraminated Drinking Water Safer? *Water Res.* **2020**, 172, 115432.

- (4) Allen, J.M., Plewa, M.J., Wagner, E.D., Wei, X., Bollar, G.E., Quirk, L.E., Liberatore, H.K., Richardson, S. D. Making Swimming Pools Safer: Does Copper–Silver Ionization with Chlorine Lower the Toxicity and Disinfection Byproduct Formation? *Environ. Sci. Technol.* **2021**, 55, 2908–2918.
- (5) Allen, J. M.; Cuthbertson, A. A.; Liberatore, H. K.; Kimura, S. Y.; Mantha, A.; Edwards, M. A.; Richardson, S. D. Showering in Flint, MI: Is There a DBP Problem? *J. Environ. Sci.* **2017**, 58, 271–284.
- (6) Kimura, S. Y.; Zheng, W.; Hipp, T. N.; M Allen, J. M.; Richardson, S.D. Total Organic Halogen (TOX) in Human Urine: A Halogen-Specific Method for Human Exposure Studies. *J. Environ. Sci.* **2017**, 58, 285–295.
- (7) Wagner, E. D.; Rayburn, A. L.; Anderson, D.; Plewa, M. J. Calibration of the Single Cell Gel Electrophoresis Assay, Flow Cytometry Analysis and Forward Mutation in Chinese Hamster Ovary Cells. *Mutagenesis* **1998**, 13, 81–84.
- (8) Wagner, E. D.; Plewa, M. J. CHO Cell Cytotoxicity and Genotoxicity Analyses of Disinfection By-Products: An Updated Review. *J. Environ. Sci.* **2017**, 58, 64–76.
- (9) Efron, B. Better Bootstrap Confidence Intervals. *J. Am. Stat. Assoc.* **1987**, 82, 171–185.
- (10) Canty, A. J.; Davison, A. C.; Hinkley, D. V.; Ventura, V. Bootstrap Diagnostics and Remedies. *Can. J. Stat.* **2006**, 34, 5–27.
- (11) Singh, K.; Xie, M. Bootstrap: A Statistical Method; Rutgers University: New Brunswick, NJ, 2008.

## Tables and Figures

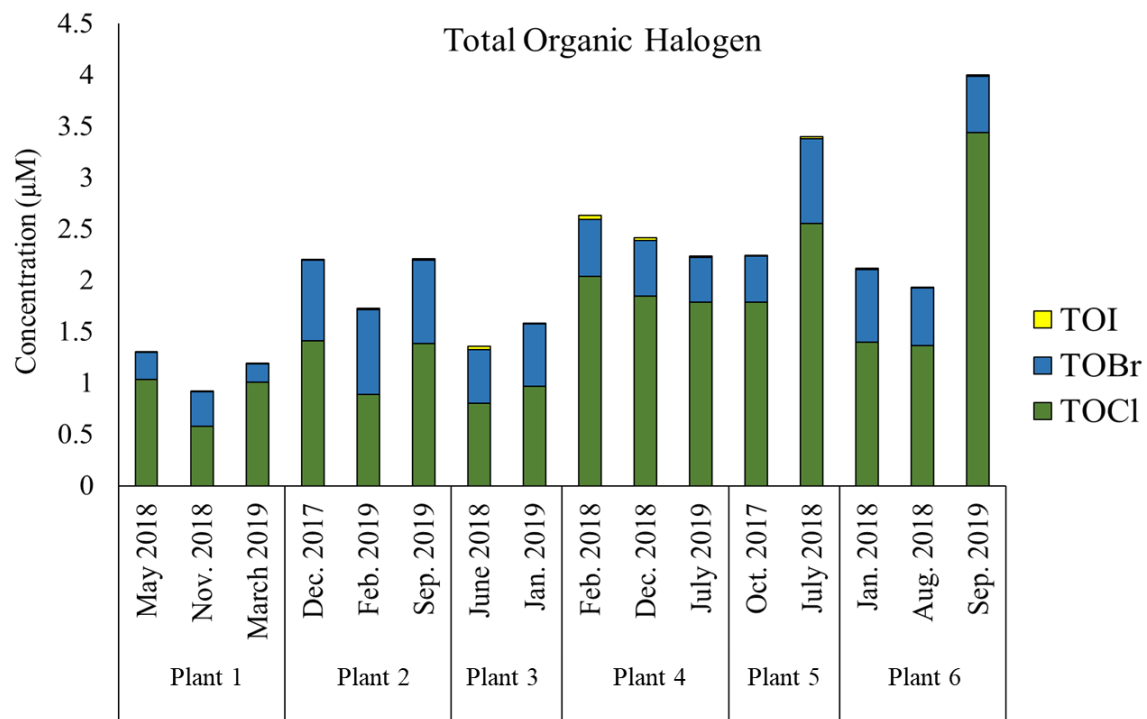

**Figure S1.** TOX data for all plants (distribution system/average).

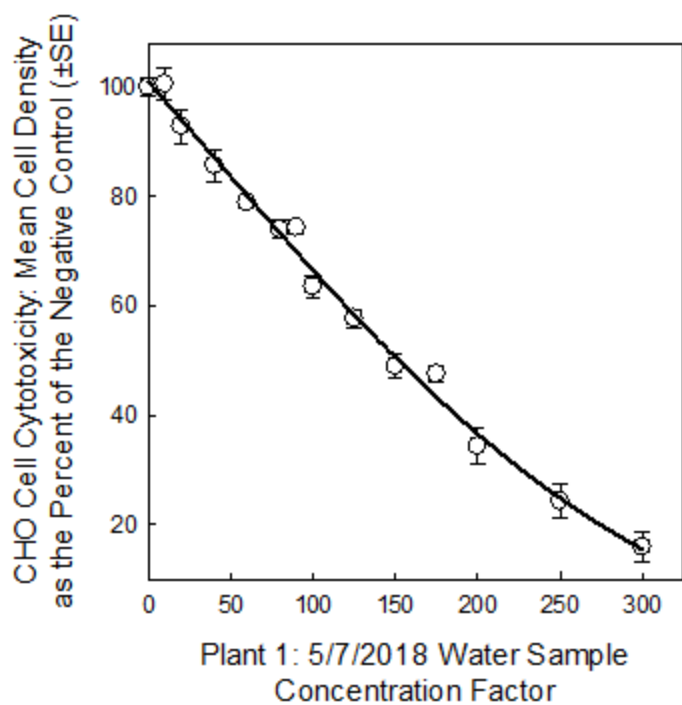

**Figure S2.** CHO cell cytotoxicity concentration-response curve for Plant 1 sample 5/7/2018.

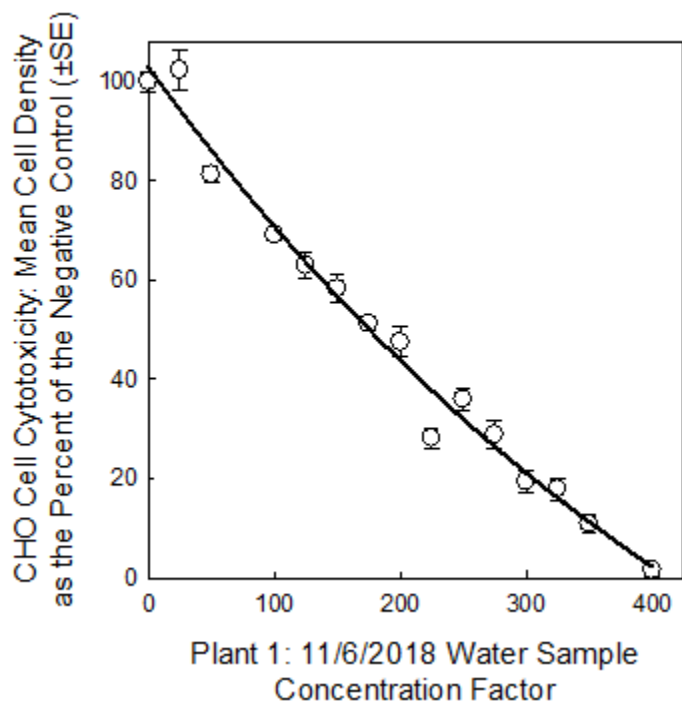

**Figure S3.** CHO cell cytotoxicity concentration-response curve for Plant 1 sample 11/6/2018.



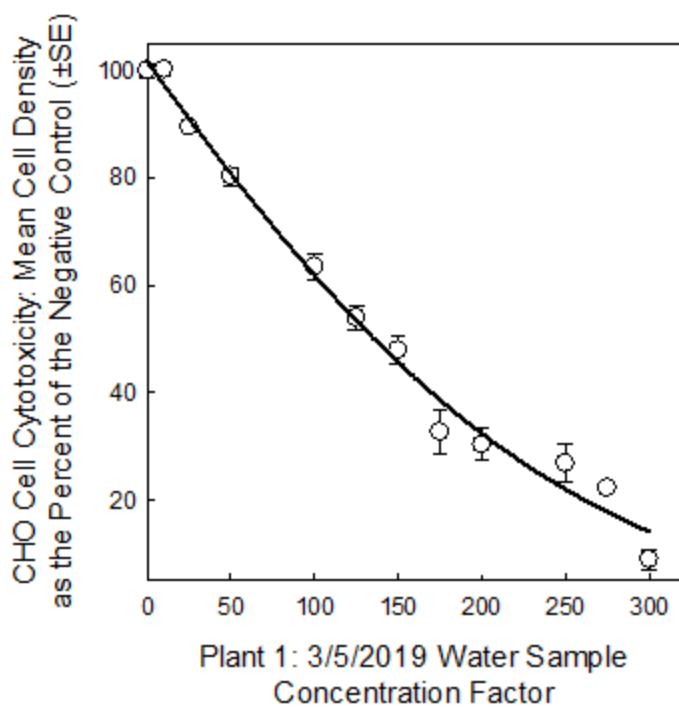

**Figure S4.** CHO cell cytotoxicity concentration-response curve for Plant 1 sample 3/5/2019.

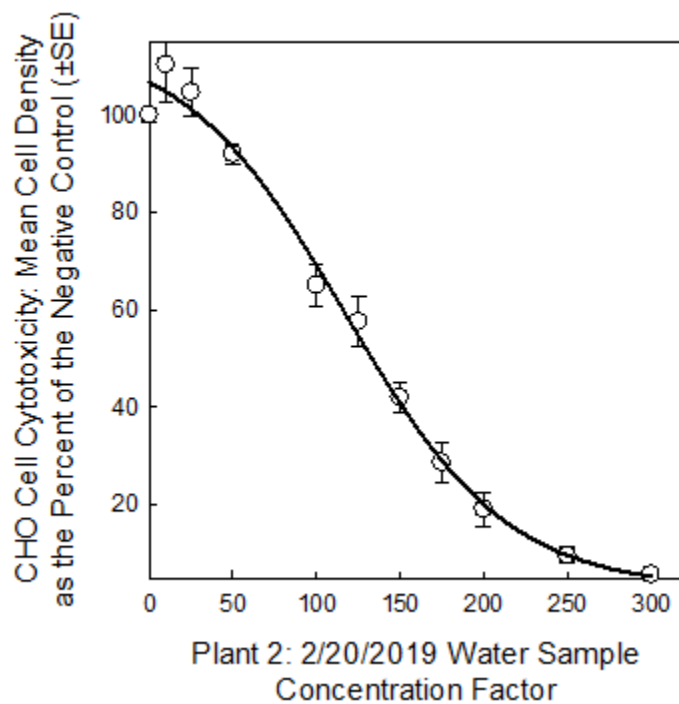

**Figure S5.** CHO cell cytotoxicity concentration-response curve for Plant 2 sample 12/14/2017.

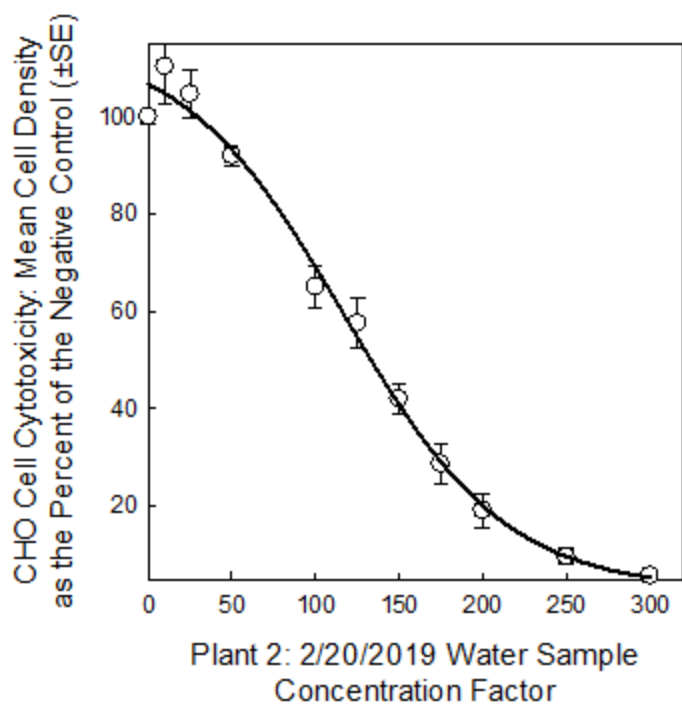

**Figure S6.** CHO cell cytotoxicity concentration-response curve for Plant 2 sample 2/20/2019.

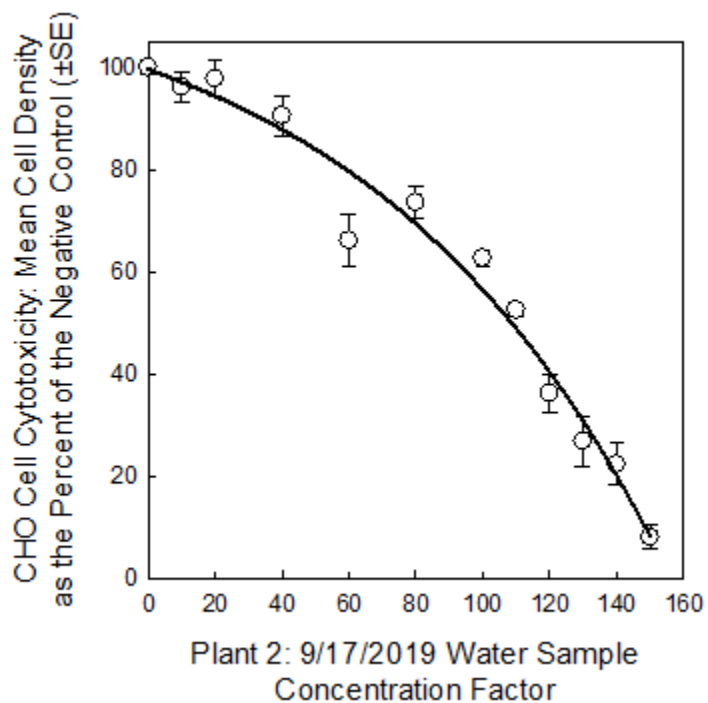

**Figure S7.** CHO cell cytotoxicity concentration-response curve for Plant 2 sample 9/17/2019.

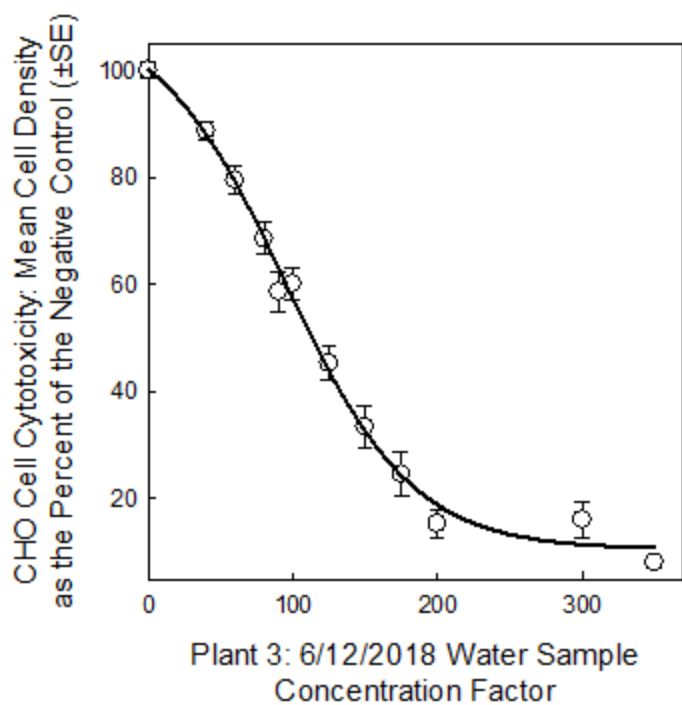

**Figure S8.** CHO cell cytotoxicity concentration-response curve for Plant 3 sample 6/12/2018.

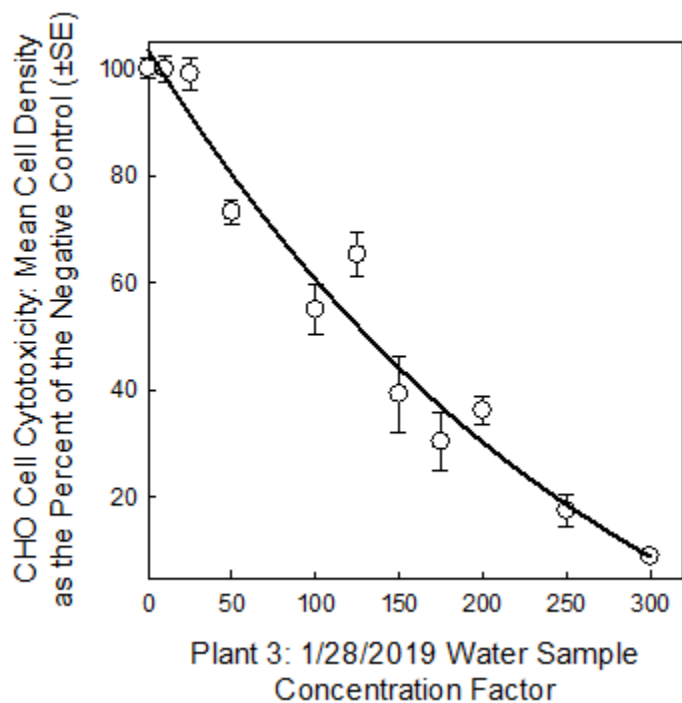

**Figure S9.** CHO cell cytotoxicity concentration-response curve for Plant 3 sample 1/28/2019.

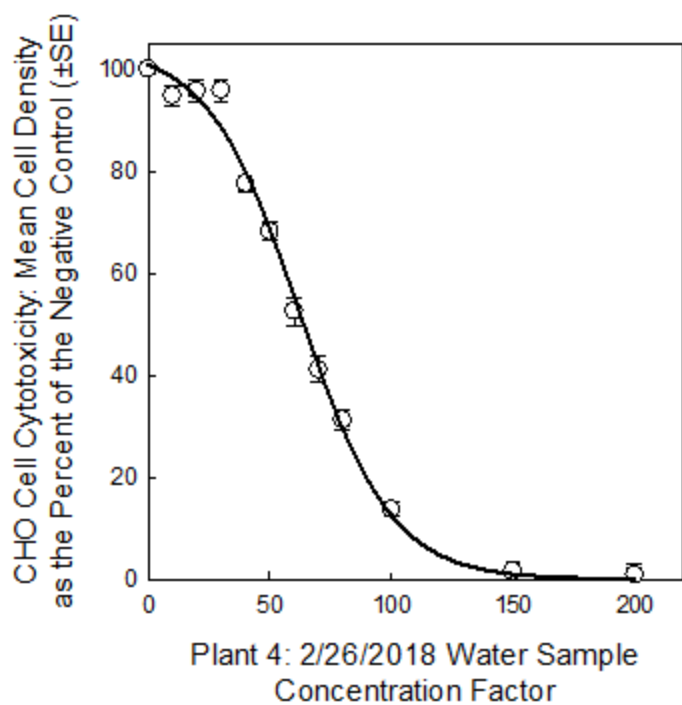

**Figure S10.** CHO cell cytotoxicity concentration-response curve for Plant 4 sample 2/26/2018.

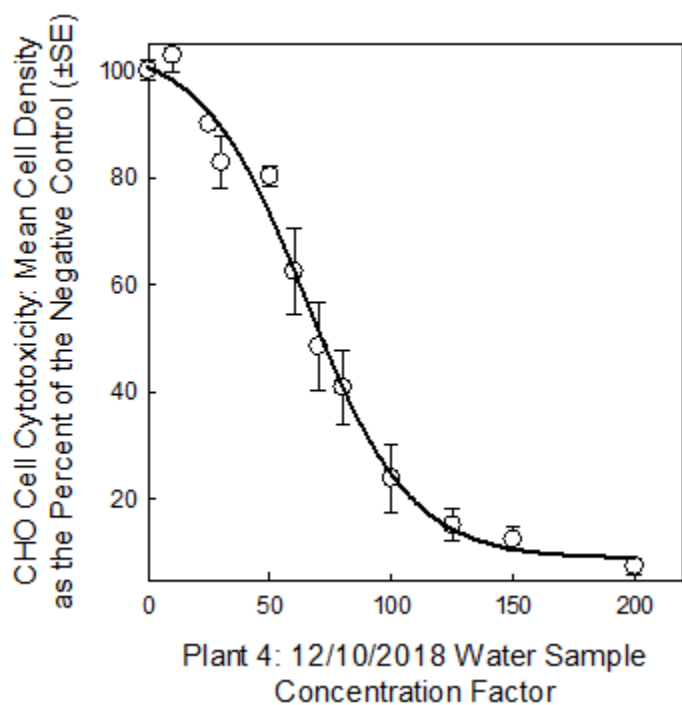

**Figure S11.** CHO cell cytotoxicity concentration-response curve for Plant 4 sample 12/10/2018.

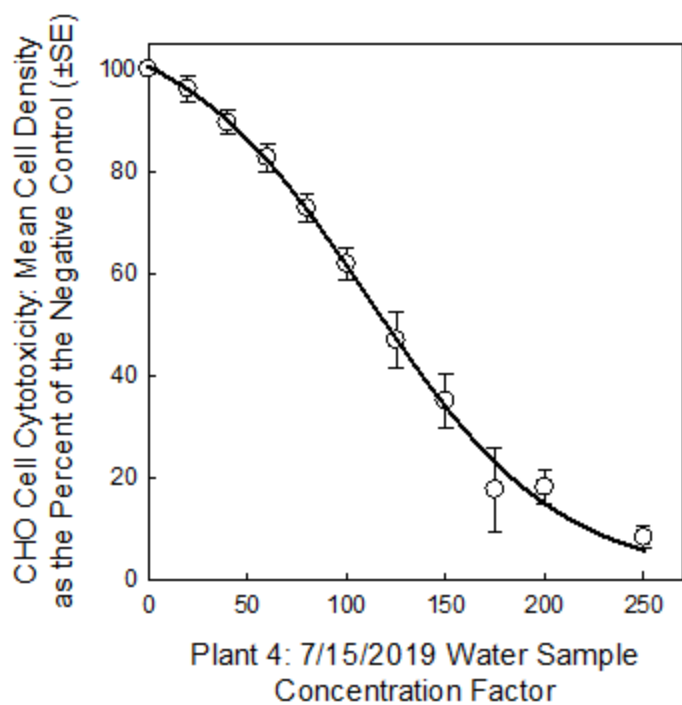

**Figure S12.** CHO cell cytotoxicity concentration-response curve for Plant 4 sample 7/15/2019.

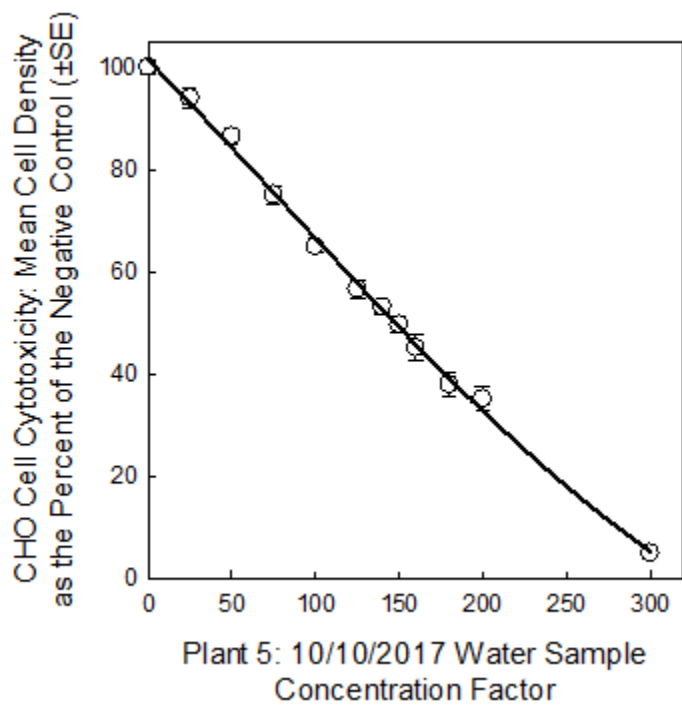

**Figure S13.** CHO cell cytotoxicity concentration-response curve for Plant 5 sample 10/10/2017.

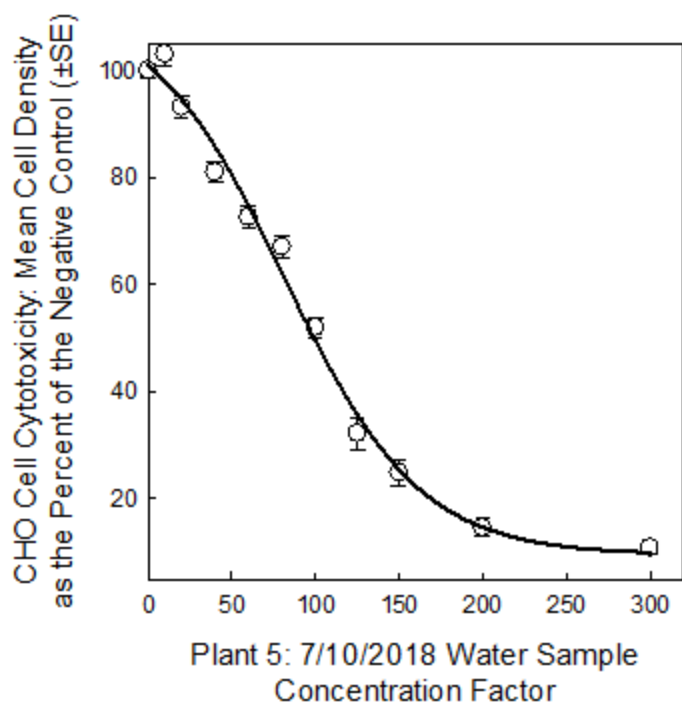

**Figure S14.** CHO cell cytotoxicity concentration-response curve for Plant 5 sample 7/10/2018.

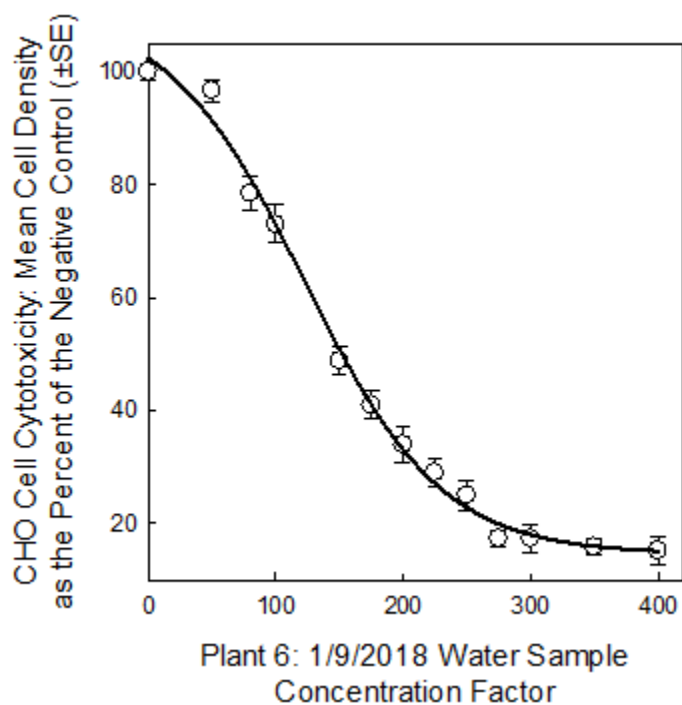

**Figure S15.** CHO cell cytotoxicity concentration-response curve for Plant 6 sample 1/9/2018.

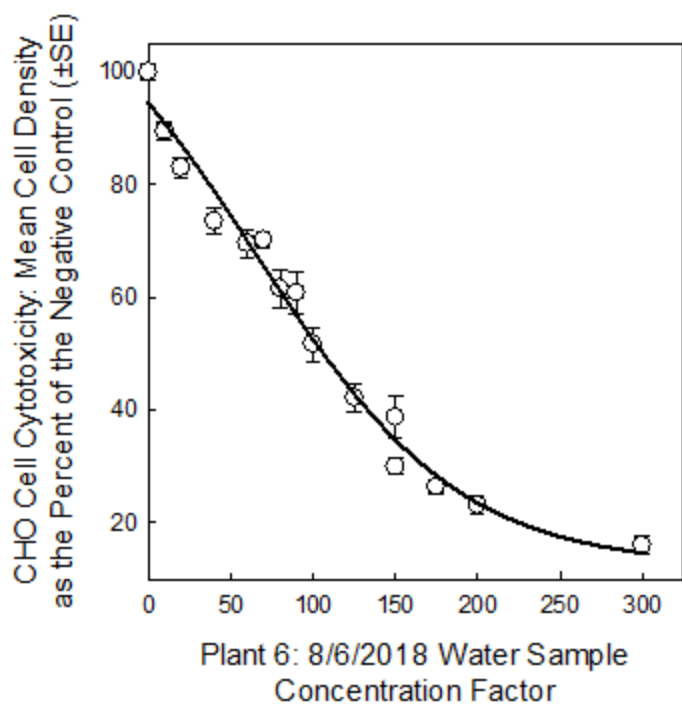

**Figure S16.** CHO cell cytotoxicity concentration-response curve for Plant 6 sample 8/6/2018.

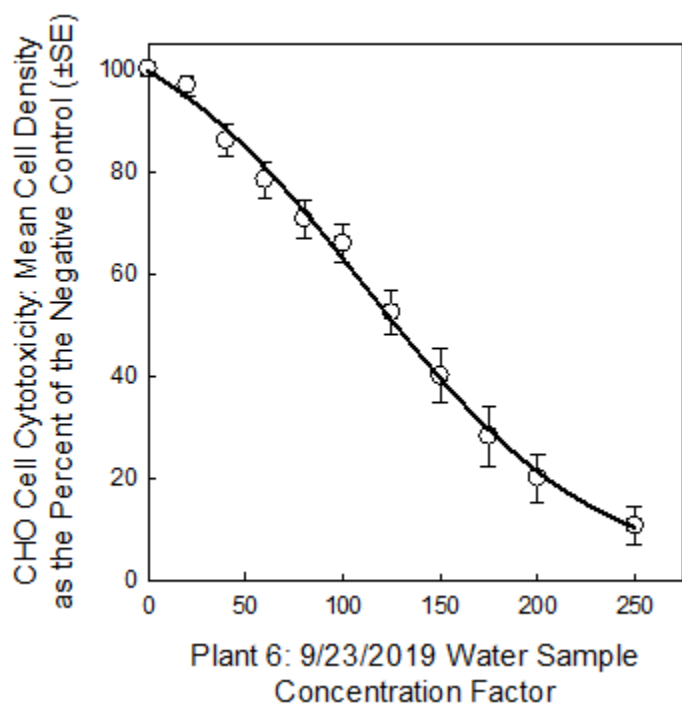

**Figure S17.** CHO cell cytotoxicity concentration-response curve for Plant 6 sample 9/23/2019.

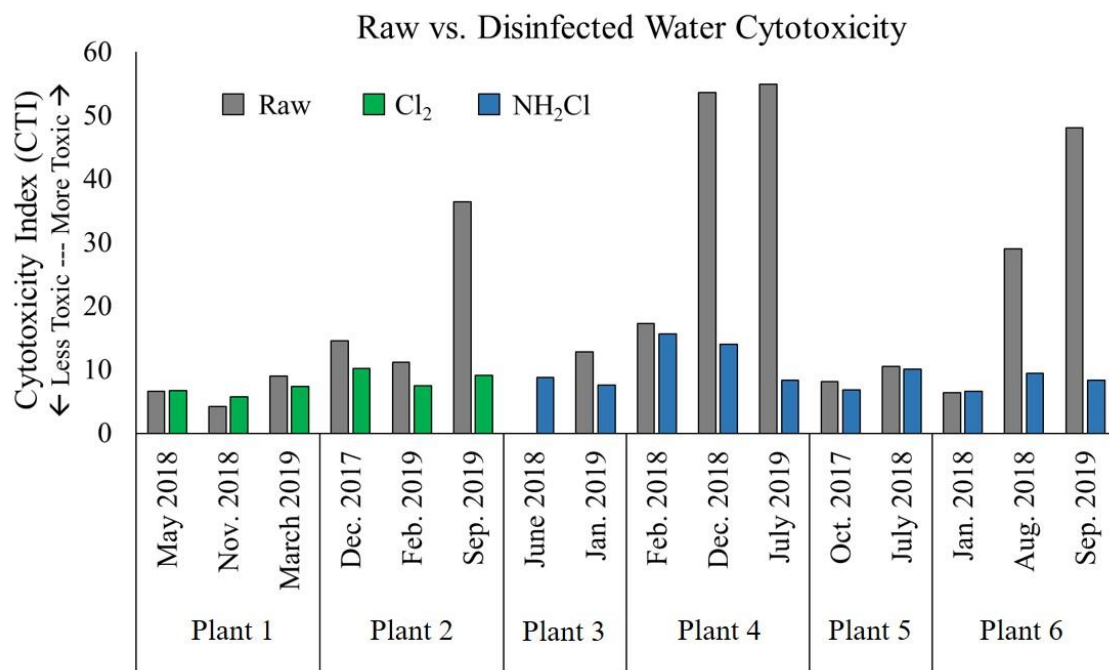

Figure S18. Raw vs. distribution system/average cytotoxicity index values for each plant.



**Table S1. Summary of analytical methods.**

| Parameter                           | Method                                                                                                                                                                             |
|-------------------------------------|------------------------------------------------------------------------------------------------------------------------------------------------------------------------------------|
| Total organic carbon                | Standard Methods <sup>a</sup>                                                                                                                                                      |
| Bromide, iodide                     | Direct analysis of raw water after 0.45 µm filtration; ion chromatography with conductivity detector                                                                               |
| TOCl, TOBr, TOI                     | GAC sorption, combustion, measurement of Cl <sup>-</sup> , Br <sup>-</sup> , and I <sup>-</sup> with ion chromatography and conductivity detector or inductively coupled plasma MS |
| THM4                                | EPA 551.1                                                                                                                                                                          |
| HAA9                                | EPA 552.2                                                                                                                                                                          |
| HAMs, HANs, HNMs, HALs, HKs, I-THMs | Liquid-liquid extraction, GC-MS analysis (and PFBHA derivatization for mono- and di-HALs)                                                                                          |
| IAAs                                | Liquid-liquid extraction, diazomethane derivatization, GC-MS/MS analysis                                                                                                           |
| Sucralose                           | Direct injection, LC-MS/MS analysis                                                                                                                                                |
| Total ammonia                       | Standard Methods <sup>a</sup>                                                                                                                                                      |
| UV <sub>254</sub>                   | Standard Methods <sup>a</sup>                                                                                                                                                      |

<sup>a</sup>American Public Health Association, American Water Works Association, and Water Environment Federation, *Standard Methods for the Examination of Water and Wastewater*, 23<sup>rd</sup> ed., American Public Health Association, Washington, D.C., 2017.

**Table S2. CHO cell cytotoxicity data for all plants.**

| Sample                       | Date  | LC <sub>50</sub> <sup>a</sup> (CF) | CTI <sup>b</sup> |
|------------------------------|-------|------------------------------------|------------------|
| Plant 1 Raw                  | May   | 151.32 ± 3.3                       | 6.64 ± 0.14      |
| Plant 1 Distribution Average | 2018  | 149.43 ± 2.58                      | 6.71 ± 0.12      |
| Plant 1 Raw                  | Nov.  | 238.53 ± 8.96                      | 4.25 ± 0.16      |
| Plant 1 Distribution Average | 2018  | 176.75 ± 3.98                      | 5.68 ± 0.13      |
| Plant 1 Raw                  | March | 111.68 ± 0.80                      | 8.96 ± 0.06      |
| Plant 1 Distribution Average | 2019  | 137.41 ± 5.05                      | 7.38 ± 0.27      |
| Plant 2 Raw                  | Dec.  | 70.26 ± 3.14                       | 14.50 ± 0.66     |
| Plant 2 Distribution Average | 2017  | 98.48 ± 2.27                       | 10.21 ± 0.26     |
| Plant 2 Raw                  | Sep.  | 27.49 ± 0.23                       | 36.4 ± 0.30      |
| Plant 2 Distribution Average | 2019  | 109.90 ± 1.32                      | 9.12 ± 0.11      |
| Plant 2 Raw                  | Feb.  | 88.84 ± 1.63                       | 11.30 ± 0.22     |
| Plant 2 Distribution Average | 2019  | 131.68 ± 2.86                      | 7.64 ± 0.18      |
| Plant 3 Raw                  | June  | 33.88 ± 1.95                       | 30.58 ± 1.87     |
| Plant 3 Distribution Average | 2018  | 116.33 ± 5.80                      | 8.81 ± 0.43      |
| Plant 3 Raw                  | Jan.  | 79.07 ± 2.41                       | 12.79 ± 0.38     |
| Plant 3 Distribution Average | 2019  | 128.48 ± 6.40                      | 8.01 ± 0.39      |
| Plant 4 Raw                  | Feb.  | 57.70 ± 0.70                       | 17.36 ± 0.22     |
| Plant 4 Distribution Average | 2018  | 63.79 ± 1.02                       | 15.72 ± 0.25     |
| Plant 4 Raw                  | Dec.  | 18.56 ± 0.53                       | 54.43 ± 1.59     |
| Plant 4 Distribution Average | 2018  | 72.35 ± 3.78                       | 14.28 ± 0.75     |
| Plant 4 Raw                  | July  | 18.26 ± 0.31                       | 54.96 ± 0.95     |
| Plant 4 Distribution Average | 2019  | 123.67 ± 5.97                      | 8.32 ± 0.42      |
| Plant 5 Raw                  | Oct.  | 123.44 ± 3.18                      | 8.15 ± 0.22      |
| Plant 5 Distribution Average | 2017  | 148.01 ± 3.35                      | 6.79 ± 0.15      |
| Plant 5 Raw                  | July  | 96.66 ± 1.37                       | 10.37 ± 0.14     |
| Plant 5 Distribution Average | 2018  | 101.29 ± 2.38                      | 9.93 ± 0.24      |
| Plant 6 Raw                  | Jan.  | 157.01 ± 4.59                      | 6.42 ± 0.18      |
| Plant 6 Distribution Average | 2018  | 152.97 ± 3.41                      | 6.57 ± 0.15      |
| Plant 6 Raw                  | Aug.  | 34.44 ± 0.55                       | 29.12 ± 0.51     |
| Plant 6 Distribution Average | 2018  | 105.25 ± 1.85                      | 9.53 ± 0.17      |
| Plant 6 Raw                  | Sep.  | 20.79 ± 0.13                       | 48.13 ± 0.30     |
| Plant 6 Distribution Average | 2019  | 128.41 ± 8.34                      | 8.34 ± 0.64      |

<sup>a</sup> The mean LC<sub>50</sub> ± (standard error) SE value is the concentration of the water sample, determined from a bootstrap multiple regression analysis of the data, that induced a cell density of 50% as compared to the concurrent negative controls. <sup>b</sup>Cytotoxicity index (CTI) is defined as (LC<sub>50</sub><sup>-1</sup>)(10)<sup>3</sup> ± SE; a higher CTI indicates higher cytotoxicity.

**Table S3. Pearson Product Moment Correlation statistical analyses for DBP and CHO cell cytotoxicity.**

| DBP Class        | All Sampling Events |                | No Plant 4         |                |
|------------------|---------------------|----------------|--------------------|----------------|
|                  | Pearson's <i>r</i>  | <i>P</i> value | Pearson's <i>r</i> | <i>P</i> value |
| THM4             | 0.36                | 0.17           | 0.48               | 0.09           |
| HAA9             | 0.53                | <b>0.03</b>    | 0.21               | 0.50           |
| Unregulated HAAs | 0.30                | 0.26           | 0.16               | 0.59           |
| HAMs             | 0.61                | <b>0.01</b>    | 0.25               | 0.41           |
| HANs             | 0.08                | 0.76           | 0.66               | <b>0.01</b>    |
| HNMs             | 0.37                | 0.18           | 0.17               | 0.60           |
| I-THMs           | 0.70                | <b>0.02</b>    | 0.31               | 0.46           |
| I-HAAs           | 0.88                | <b>0.0007</b>  | 0.23               | 0.62           |
| HALs             | 0.05                | 0.86           | 0.39               | 0.19           |
| HKs              | 0.18                | 0.53           | 0.37               | 0.26           |
| Mono-Halo DBPs   | -0.42               | 0.19           |                    |                |
| Di-Halo DBPs     | 0.64                | <b>0.008</b>   |                    |                |
| Tri-Halo DBPs    | 0.22                | 0.13           |                    |                |
| Summed N-DBPs    | 0.57                | <b>0.02</b>    |                    |                |
| Summed C-DBPs    | 0.45                | 0.09           |                    |                |

\*Bold *P* value indicates a significant correlation.

**Table S4. Summary of chemical doses applied for each plant.**

| Plant   | Date      | O <sub>3</sub><br>(mg/L) | UV<br>(mJ/cm <sup>2</sup> ) | H <sub>2</sub> O <sub>2</sub><br>(mg/L) | Chlorine<br>(mg/L) |
|---------|-----------|--------------------------|-----------------------------|-----------------------------------------|--------------------|
| Plant 1 | 5/7/18    | NA                       | ~25                         | NA                                      | 1.6                |
| Plant 1 | 11/6/2018 | NA                       | ~25                         | NA                                      | 1.4                |
| Plant 1 | 3/5/2019  | NA                       | ~25                         | NA                                      | 1.3                |
| Plant 2 | 12/12/17  | NA                       | NA                          | NA                                      | 3.4                |
| Plant 2 | 2/19/2019 | NA                       | NA                          | NA                                      | 4.0                |
| Plant 2 | 9/17/2019 | NA                       | NA                          | NA                                      | 3.9                |
| Plant 3 | 6/11/2018 | 1.36                     | NA                          | NA                                      | 3.2                |
| Plant 3 | 1/28/2019 | 1.17                     | NA                          | NA                                      | 3.1                |
| Plant 4 | 2/26/18   | NA                       | NA                          | NA                                      | 4.2                |
| Plant 4 | 12/2018   | NA                       | NA                          | NA                                      | 4.1                |
| Plant 4 | 7/2019    | NA                       | NA                          | NA                                      | 5.0                |
| Plant 5 | 10/10/17  | NA                       | NA                          | NA                                      | 17.8               |
| Plant 5 | 7/10/18   | NA                       | NA                          | NA                                      | 14.0               |
| Plant 6 | 1/9/18    | NA                       | >500                        | 2.5                                     | 4.1                |
| Plant 6 | 8/6/18    | NA                       | >500                        | 1.75                                    | 3.3                |
| Plant 6 | 9/2019    | NA                       | >500                        | 1.60                                    | 3.2                |

\*NA = not applicable

**Unregulated DBP Abbreviation Key for Quantitative Data Tables:**

D = di

T = tri

Te = tetra

C = chloro

B = bromo

I = iodo

AL = aldehyde

P = propanone

NM = nitromethane

AN = acetonitrile

AM = acetamide

M = methane

AA = acetic acid

**Table S5. Mean unregulated DBP data for Plant 1.**

|             |            | Concentration - µg/L (nM) |                     |                      |                       |
|-------------|------------|---------------------------|---------------------|----------------------|-----------------------|
| Compound    | MRL (µg/L) | Raw                       | Dist. Avg. May 2018 | Dist. Avg. Nov. 2018 | Dist. Avg. March 2019 |
| HNMs        |            |                           |                     |                      |                       |
| BDCNM       | 0.1        | ND                        | 0.2 (1.0)           | 0.1 (0.3)            | 0.2 (1.0)             |
| DBCNM       | 0.1        | ND                        | 0.6 (2.6)           | 0.2 (0.8)            | 0.2 (0.8)             |
| TBNM        | 0.1        | ND                        | 1.0 (3.5)           | 0.7 (2.4)            | < 0.1                 |
| DCNM        | 0.1        | ND                        | ND                  | ND                   | ND                    |
| BCNM        | 0.1        | ND                        | < 0.1               | ND                   | < 0.1                 |
| DBNM        | 0.1        | ND                        | < 0.1               | < 0.1                | < 0.1                 |
| TCNM        | 0.1        | ND                        | < 0.1               | < 0.1                | 0.2 (1.2)             |
| HALs        |            |                           |                     |                      |                       |
| TCAL        | 0.1        | ND                        | 1.5 (10.3)          | 0.3 (2.4)            | 1.3 (8.8)             |
| BDCAL       | 0.1        | ND                        | 0.4 (2.0)           | 0.4 (1.9)            | 0.8 (4.2)             |
| DBCAL       | 0.1        | ND                        | < 0.1               | 0.1 (0.5)            | 0.3 (1.3)             |
| TBAL        | 0.1        | ND                        | < 0.1               | < 0.1                | < 0.1                 |
| CAL         | 0.1        | ND                        | ND                  | ND                   | ND                    |
| DCAL        | 0.1        | ND                        | < 0.1               | < 0.1                | < 0.1                 |
| BAL         | 0.1        | ND                        | ND                  | ND                   | ND                    |
| BCAL        | 0.1        | ND                        | < 0.1               | < 0.1                | < 0.1                 |
| IAL         | 0.1        | ND                        | ND                  | ND                   | ND                    |
| DBAL        | 0.1        | ND                        | ND                  | ND                   | ND                    |
| HANs        |            |                           |                     |                      |                       |
| DCAN        | 0.1        | ND                        | 0.3 (2.7)           | < 0.1                | 0.5 (4.5)             |
| BCAN        | 0.1        | ND                        | 0.4 (2.6)           | 0.4 (2.7)            | 0.6 (3.9)             |
| TBAN        | 0.1        | ND                        | 0.3 (1.1)           | 0.4 (1.3)            | 0.2 (0.7)             |
| TCAN        | 0.1        | ND                        | < 0.1               | ND                   | < 0.1                 |
| CAN         | 0.25       | ND                        | ND                  | ND                   | ND                    |
| BAN         | 0.1        | ND                        | < 0.1               | ND                   | ND                    |
| DBAN        | 0.1        | ND                        | 0.3 (1.5)           | 0.7 (3.3)            | 0.3 (1.5)             |
| IAN         | 0.1        | ND                        | ND                  | ND                   | ND                    |
| BDCAN       | 0.1        | ND                        | NM                  | ND                   | 0.1 (0.5)             |
| DBCAN       | 0.1        | ND                        | NM                  | < 0.1                | ND                    |
| HKs         |            |                           |                     |                      |                       |
| 1,1-DCP     | 0.1        | ND                        | ND                  | ND                   | ND                    |
| CP          | 0.1        | ND                        | ND                  | ND                   | ND                    |
| 1,1,1-TCP   | 0.1        | ND                        | 0.1 (0.6)           | < 0.1                | 0.4 (2.5)             |
| 1,1-DBP     | 0.1        | ND                        | ND                  | ND                   | ND                    |
| 1-B-1,1-DCP | 0.1        | ND                        | ND                  | ND                   | 0.1 (0.8)             |

|               |      |    |             |           |           |
|---------------|------|----|-------------|-----------|-----------|
| 1,3-DCP       | 0.1  | ND | < 0.1       | ND        | ND        |
| 1,1,3-TCP     | 0.1  | ND | ND          | ND        | ND        |
| 1,1,3,3-TeCP  | 0.1  | ND | ND          | < 0.1     | ND        |
| 1,1,3,3-TeBP  | 0.1  | ND | ND          | ND        | ND        |
| <b>I-THMs</b> |      |    |             |           |           |
| DCIM          | 0.1  | ND | ND          | ND        | ND        |
| BCIM          | 0.1  | ND | < 0.1       | < 0.1     | < 0.1     |
| DBIM          | 0.1  | ND | < 0.1       | < 0.1     | < 0.1     |
| CDIM          | 0.1  | ND | ND          | ND        | ND        |
| BDIM          | 0.1  | ND | ND          | ND        | ND        |
| TIM           | 0.1  | ND | ND          | ND        | ND        |
| <b>HAMs</b>   |      |    |             |           |           |
| CAM           | 1.0  | ND | ND          | ND        | ND        |
| BAM           | 1.0  | ND | ND          | ND        | ND        |
| IAM           | 1.0  | ND | ND          | ND        | ND        |
| BCAM          | 0.2  | ND | 0.6 (3.6)   | 0.6 (3.3) | 0.6 (3.5) |
| TCAM          | 0.1  | ND | ND          | ND        | < 0.1     |
| DCAM          | 0.3  | ND | 0.6 (4.4)   | 0.3 (2.4) | 0.7 (5.5) |
| DBAM          | 0.2  | ND | 0.4 (1.7)   | 1.1 (4.9) | 0.3 (1.4) |
| CIAM          | 0.3  | ND | ND          | ND        | ND        |
| BIAM          | 0.5  | ND | ND          | ND        | ND        |
| DBCAM         | 0.1  | ND | ND          | ND        | ND        |
| TBAM          | 0.1  | ND | < 0.1       | 0.1 (0.4) | ND        |
| DIAM          | 0.1  | ND | ND          | ND        | ND        |
| BDCAM         | 0.1  | ND | < 0.1       | ND        | < 0.1     |
| <b>IAs</b>    |      |    |             |           |           |
| IAA           | .010 | ND | < 0.010     | < 0.010   | ND        |
| CIAA          | .025 | ND | 0.069 (0.3) | < 0.025   | ND        |
| BIAA          | .025 | ND | ND          | < 0.025   | ND        |
| DIAA          | .015 | ND | ND          | ND        | ND        |

**Table S6. Mean THM4 and HAA9 data for Plant 1.**

| Compound                 | Concentration - µg/L (nM) |                        |                         |                         |                          |                          |
|--------------------------|---------------------------|------------------------|-------------------------|-------------------------|--------------------------|--------------------------|
|                          | Dist. Avg.<br>May 2018    | Dist. Max.<br>May 2018 | Dist. Avg.<br>Nov. 2018 | Dist. Max.<br>Nov. 2018 | Dist. Avg.<br>March 2019 | Dist. Max.<br>March 2019 |
| <b>THMs</b>              |                           |                        |                         |                         |                          |                          |
| Trichloromethane         | 7.0 (58.6)                | 17 (142)               | 1.9 (15.9)              | 0.8 (6.7)               | 5.5 (46.1)               | 14 (117)                 |
| Bromodichloromethane     | 6.1 (37.2)                | 8.6 (52.5)             | 4.7 (28.7)              | 1.4 (8.5)               | 4.4 (26.9)               | 7.0 (42.7)               |
| Dibromochloromethane     | 5.4 (25.9)                | 5.2 (25.0)             | 8.2 (39.4)              | 1.9 (9.1)               | 2.6 (12.5)               | 3.6 (17.3)               |
| Tribromomethane          | 1.0 (4.0)                 | 0.7 (2.8)              | 4.0 (15.8)              | 0.8 (3.2)               | ND                       | ND                       |
| <b>HAAs</b>              |                           |                        |                         |                         |                          |                          |
| Chloroacetic acid        | ND                        | ND                     | ND                      | ND                      | ND                       | ND                       |
| Bromoacetic acid         | ND                        | ND                     | ND                      | ND                      | ND                       | ND                       |
| Dichloroacetic acid      | 2.8 (21.7)                | 5.9 (45.8)             | ND                      | 1.7 (13.2)              | 1.5 (11.6)               | 4.5 (34.9)               |
| Bromochloroacetic acid   | 2.1 (12.1)                | 2.8 (16.1)             | 1.5 (8.7)               | 2.1 (12.1)              | ND                       | 1.2 (6.9)                |
| Dibromoacetic acid       | ND                        | ND                     | 2.7 (12.4)              | 3.1 (14.2)              | ND                       | ND                       |
| Trichloroacetic acid     | 1.0 (6.1)                 | 2.5 (15.3)             | ND                      | ND                      | ND                       | 1.6 (9.8)                |
| Bromodichloroacetic acid | ND                        | ND                     | ND                      | ND                      | ND                       | ND                       |
| Chlorodibromoacetic acid | ND                        | ND                     | ND                      | ND                      | ND                       | ND                       |
| Tribromoacetic acid      | ND                        | ND                     | ND                      | ND                      | ND                       | ND                       |

**Table S7. Mean total organic halogen data for Plant 1 - µg/L (µM).**

| <b>Date</b>              | <b>Sample</b> | <b>TOCl (as Cl-)</b> | <b>TOBr (as Br-)</b> | <b>TOI (as I-)</b> |
|--------------------------|---------------|----------------------|----------------------|--------------------|
| <b>May<br/>2018</b>      | Raw           | 13.4 (0.38)          | 3.2 (0.04)           | 0.9 (0.007)        |
|                          | Effluent      | 28.2 (0.79)          | 19.9 (0.25)          | 0.6 (0.004)        |
|                          | Dist. Avg.    | 36.8 (1.04)          | 20.9 (0.26)          | 0.7 (0.005)        |
|                          | Dist. Max     | 59.6 (1.68)          | 20.7 (0.26)          | 0.5 (0.004)        |
| <b>November<br/>2018</b> | Raw           | 7.0 (0.20)           | 2.3 (0.03)           | 1.2 (0.009)        |
|                          | Effluent      | 14.6 (0.41)          | 21.5 (0.27)          | 0.3 (0.002)        |
|                          | Dist. Avg.    | 20.6 (0.58)          | 26.7 (0.33)          | 0.4 (0.003)        |
|                          | Dist. Max.    | 25.8 (0.73)          | 31.8 (0.40)          | 0.3 (0.002)        |
| <b>March<br/>2019</b>    | Raw           | 6.7 (0.19)           | 1.2 (0.02)           | 0.4 (0.003)        |
|                          | Effluent      | 17.4 (0.49)          | 10.7 (0.13)          | 0.3 (0.002)        |
|                          | Dist. Avg.    | 35.7 (1.01)          | 14.4 (0.18)          | 0.3 (0.002)        |
|                          | Dist. Max     | 60.3 (1.70)          | 16.7 (0.21)          | 0.3 (0.002)        |



**Table S8. Water quality parameters for Plant 1.**

| <b>Date</b>              | <b>Sample</b> | <b>Sucralose<br/>(ug/L)</b> | <b>TOC<br/>(mg/L)</b> | <b>UV<sub>254</sub><br/>(abs/cm)</b> | <b>SUVA<br/>(L/mg-m)</b> | <b>Total<br/>Ammonia<br/>(mg/L)</b> | <b>Br-<br/>(µg/L)</b> | <b>I-<br/>(µg/L)</b> |
|--------------------------|---------------|-----------------------------|-----------------------|--------------------------------------|--------------------------|-------------------------------------|-----------------------|----------------------|
| <b>May<br/>2018</b>      | Raw           | 0.40                        | 2.5                   | 0.093                                | 3.7                      | 0.08                                | 30                    | < 10                 |
|                          | Effluent      | --                          | 0.8                   | 0.017                                | 2.1                      | --                                  | --                    | --                   |
|                          | Dist. Avg.    | --                          | --                    | --                                   | --                       | --                                  | --                    | --                   |
|                          | Dist. Max.    | --                          | --                    | --                                   | --                       | --                                  | --                    | --                   |
| <b>November<br/>2018</b> | Raw           | 0.80                        | 4.2                   | 0.114                                | 2.7                      | 0.19                                | 44                    | < 10                 |
|                          | Effluent      | --                          | 1.0                   | 0.008                                | 0.8                      | --                                  | --                    | --                   |
|                          | Dist. Avg.    | --                          | --                    | --                                   | --                       | --                                  | --                    | --                   |
|                          | Dist. Max.    | --                          | --                    | --                                   | --                       | --                                  | --                    | --                   |
| <b>March<br/>2019</b>    | Raw           | ND                          | 2.0                   | 0.054                                | 2.8                      | 0.13                                | 20                    | < 10                 |
|                          | Effluent      | --                          | 1.0                   | 0.016                                | 1.6                      | --                                  | --                    | --                   |
|                          | Dist. Avg.    | --                          | --                    | --                                   | --                       | --                                  | --                    | --                   |
|                          | Dist. Max.    | --                          | --                    | --                                   | --                       | --                                  | --                    | --                   |

**Table S9. Mean unregulated DBP data for Plant 2.**

| Compound    | MRL<br>(µg/L) | Concentration - µg/L (nM) |                         |                         |                          |
|-------------|---------------|---------------------------|-------------------------|-------------------------|--------------------------|
|             |               | Raw                       | Dist. Avg.<br>Dec. 2017 | Dist. Avg.<br>Feb. 2019 | Dist. Avg.<br>Sept. 2019 |
| <b>HNMs</b> |               |                           |                         |                         |                          |
| BDCNM       | 0.1           | ND                        | ND                      | 0.2 (1.0)               | < 0.1                    |
| DBCNM       | 0.1           | ND                        | ND                      | 0.2 (0.8)               | < 0.25                   |
| TBNM        | 0.5           | ND                        | ND                      | 0.5 (1.7)               | < 0.5                    |
| DCNM        | 0.1           | ND                        | ND                      | ND                      | ND                       |
| BCNM        | 0.1           | ND                        | 0.1                     | ND                      | ND                       |
| DBNM        | 0.1           | ND                        | 0.1                     | 0.3 (1.4)               | < 0.1                    |
| TCNM        | 0.1           | ND                        | < 0.1                   | < 0.1                   | ND                       |
| <b>HALs</b> |               |                           |                         |                         |                          |
| TCAL        | 0.1           | ND                        | 0.4 (2.7)               | 0.4 (2.7)               | 0.5 (3.2)                |
| BDCAL       | 0.1           | ND                        | 0.8 (4.2)               | 1.3 (6.8)               | 0.7 (3.9)                |
| DBCAL       | 0.1           | ND                        | 1.3 (5.5)               | 0.7 (3.0)               | 0.3 (1.2)                |
| TBAL        | 0.1           | ND                        | 0.3 (1.1)               | 0.3 (1.1)               | < 0.1                    |
| CAL         | 0.1           | ND                        | ND                      | ND                      | ND                       |
| DCAL        | 0.1           | ND                        | < 0.1                   | ND                      | < 0.1                    |
| BAL         | 0.1           | ND                        | ND                      | ND                      | ND                       |
| BCAL        | 0.1           | ND                        | < 0.1                   | < 0.1                   | < 0.1                    |
| IAL         | 0.1           | ND                        | ND                      | ND                      | ND                       |
| DBAL        | 0.1           | ND                        | ND                      | ND                      | < 0.1                    |
| <b>HANs</b> |               |                           |                         |                         |                          |
| DCAN        | 0.1           | ND                        | 0.4 (3.6)               | < 0.1                   | 0.1 (1.0)                |
| BCAN        | 0.1           | ND                        | 1.0 (6.5)               | 1.1 (7.1)               | 0.7 (4.8)                |
| TBAN        | 0.1           | ND                        | 0.2 (0.7)               | 0.2 (0.7)               | 0.2 (0.8)                |
| TCAN        | 0.1           | ND                        | ND                      | ND                      | ND                       |
| CAN         | 0.25          | ND                        | 0.1 (1.3)               | ND                      | ND                       |
| BAN         | 0.1           | ND                        | ND                      | ND                      | ND                       |
| DBAN        | 0.1           | ND                        | 1.7 (8.5)               | 2.1 (10.6)              | 1.6 (8.2)                |
| IAN         | 0.1           | ND                        | ND                      | ND                      | ND                       |
| BDCAN       | 0.1           | ND                        | NM                      | < 0.1                   | ND                       |
| DBCAN       | 0.1           | ND                        | NM                      | 0.2 (0.9)               | ND                       |
| <b>HKs</b>  |               |                           |                         |                         |                          |
| 1,1-DCP     | 0.1           | ND                        | 0.1 (0.8)               | ND                      | ND                       |
| CP          | 0.1           | ND                        | 0.4 (4.3)               | ND                      | ND                       |
| 1,1,1-TCP   | 0.1           | ND                        | 0.4 (2.5)               | < 0.1                   | < 0.1                    |
| 1,1-DBP     | 0.1           | ND                        | 0.3 (1.4)               | 0.3 (1.4)               | < 0.1                    |
| 1-B-1,1-DCP | 0.1           | ND                        | ND                      | ND                      | ND                       |

|               |      |    |            |            |             |
|---------------|------|----|------------|------------|-------------|
| 1,3-DCP       | 0.1  | ND | ND         | ND         | ND          |
| 1,1,3-TCP     | 0.1  | ND | ND         | ND         | ND          |
| 1,1,3,3-TeCP  | 0.1  | ND | < 0.1      | ND         | ND          |
| 1,1,3,3-TeBP  | 0.1  | ND | ND         | 0.3 (0.8)  | ND          |
| <b>I-THMs</b> |      |    |            |            |             |
| DCIM          | 0.1  | ND | ND         | 0.4 (1.9)  | < 0.1       |
| BCIM          | 0.1  | ND | 0.1 (0.4)  | 0.3 (1.2)  | < 0.1       |
| DBIM          | 0.1  | ND | ND         | 0.2 (0.7)  | < 0.1       |
| CDIM          | 0.1  | ND | ND         | ND         | ND          |
| BDIM          | 0.1  | ND | ND         | ND         | ND          |
| TIM           | 0.1  | ND | ND         | ND         | ND          |
| <b>HAMs</b>   |      |    |            |            |             |
| CAM           | 1.0  | ND | ND         | ND         | ND          |
| BAM           | 1.0  | ND | ND         | ND         | ND          |
| IAM           | 1.0  | ND | ND         | ND         | ND          |
| BCAM          | 0.2  | ND | 0.6 (3.5)  | 1.0 (5.8)  | 1.0 (5.5)   |
| TCAM          | 0.1  | ND | ND         | ND         | < 0.1       |
| DCAM          | 0.3  | ND | ND         | 0.4 (3.1)  | 0.5 (4.0)   |
| DBAM          | 0.2  | ND | 2.7 (12.5) | 2.3 (10.6) | 2.1 (9.5)   |
| CIAM          | 0.3  | ND | ND         | ND         | ND          |
| BIAM          | 0.5  | ND | ND         | ND         | ND          |
| DBCAM         | 0.1  | ND | ND         | 0.3 (1.2)  | 0.3 (1.0)   |
| TBAM          | 0.1  | ND | ND         | 0.5 (1.7)  | 0.3 (1.1)   |
| DIAM          | 0.1  | ND | ND         | ND         | ND          |
| BDCAM         | 0.1  | ND | 0.4 (1.9)  | 0.2 (1.0)  | < 0.1       |
| <b>IAs</b>    |      |    |            |            |             |
| IAA           | .010 | ND | ND         | ND         | 0.040 (0.2) |
| CIAA          | .025 | ND | ND         | ND         | ND          |
| BIAA          | .025 | ND | ND         | ND         | < 0.025     |
| DIAA          | .015 | ND | ND         | ND         | ND          |

**Table S10. Mean THM4 and HAA9 data for Plant 2.**

| Compound                 | Concentration - µg/L (nM) |                         |                         |                         |                         |                         |
|--------------------------|---------------------------|-------------------------|-------------------------|-------------------------|-------------------------|-------------------------|
|                          | Dist. Avg.<br>Dec. 2017   | Dist. Max.<br>Dec. 2017 | Dist. Avg.<br>Feb. 2019 | Dist. Max.<br>Feb. 2019 | Dist. Avg.<br>Sep. 2019 | Dist. Max.<br>Sep. 2019 |
| <b>THMs</b>              |                           |                         |                         |                         |                         |                         |
| Trichloromethane         | 13 (109)                  | 12 (101)                | 2.8 (23.5)              | 2.0 (16.8)              | 11 (92.1)               | 9.5 (79.6)              |
| Bromodichloromethane     | 19 (116)                  | 19 (116)                | 8.2 (50.1)              | 6.0 (36.6)              | 17 (104)                | 16 (97.7)               |
| Dibromochloromethane     | 16 (76.8)                 | 17 (81.6)               | 16 (76.8)               | 12 (57.6)               | 23 (110)                | 22 (106)                |
| Tribromomethane          | 5.8 (22.9)                | 5.4 (21.4)              | 12 (47.5)               | 9.1 (36.0)              | 13 (51.4)               | 12 (47.5)               |
| <b>HAAs</b>              |                           |                         |                         |                         |                         |                         |
| Chloroacetic acid        | ND                        | ND                      | ND                      | ND                      | ND                      | ND                      |
| Bromoacetic acid         | ND                        | ND                      | ND                      | ND                      | ND                      | 1.1 (7.9)               |
| Dichloroacetic acid      | 2.0 (15.5)                | 2.7 (20.9)              | ND                      | ND                      | 2.1 (16.3)              | 2.7 (20.9)              |
| Bromochloroacetic acid   | 2.4 (13.8)                | --                      | 1.8 (10.4)              | 1.2 (6.9)               | 4.1 (23.6)              | 4.6 (26.5)              |
| Dibromoacetic acid       | 2.4 (11.0)                | 4.3 (19.7)              | 3.5 (16.1)              | 2.2 (10.1)              | 6.2 (28.5)              | 6.7 (30.8)              |
| Trichloroacetic acid     | ND                        | 1.0 (6.1)               | ND                      | ND                      | ND                      | ND                      |
| Bromodichloroacetic acid | ND                        | --                      | ND                      | ND                      | 1.1 (5.3)               | 1.2 (5.8)               |
| Chlorodibromoacetic acid | 1.1 (4.4)                 | --                      | 1.1 (4.4)               | ND                      | 2.0 (7.9)               | 2.2 (8.7)               |
| Tribromoacetic acid      | ND                        | --                      | ND                      | ND                      | ND                      | ND                      |

**Table S11. Mean total organic halogen data for Plant 2 - µg/L (µM).**

| <b>Date</b>               | <b>Sample</b> | <b>TOCl (as Cl-)</b> | <b>TOBr (as Br-)</b> | <b>TOI (as I-)</b> |
|---------------------------|---------------|----------------------|----------------------|--------------------|
| <b>December<br/>2017</b>  | Raw           | 15.7 (0.44)          | 8.7 (0.11)           | 2.2 (0.02)         |
|                           | Effluent      | 83.0 (2.34)          | 24.9 (0.31)          | 0.8 (0.006)        |
|                           | Dist. Avg.    | 50.2 (1.41)          | 62.7 (0.78)          | 0.8 (0.006)        |
|                           | Dist. Max     | 54.9 (1.55)          | 66.5 (0.83)          | 0.6 (0.005)        |
| <b>February<br/>2019</b>  | Raw           | 13.3 (0.37)          | 8.2 (0.10)           | 3.9 (0.03)         |
|                           | Effluent      | 20.0 (0.56)          | 20.0 (0.25)          | 0.7 (0.006)        |
|                           | Dist. Avg.    | 31.6 (0.89)          | 66.2 (0.83)          | 0.9 (0.007)        |
|                           | Dist. Max.    | 27.0 (0.76)          | 51.3 (0.64)          | 0.8 (0.006)        |
| <b>September<br/>2019</b> | Raw           | 38.8 (1.09)          | 7.9 (0.10)           | 4.1 (0.03)         |
|                           | Effluent      | 50.3 (1.42)          | 19.8 (0.25)          | 1.0 (0.008)        |
|                           | Dist. Avg.    | 49.2 (1.38)          | 65.0 (0.81)          | 1.6 (0.01)         |
|                           | Dist. Max     | 81.1 (2.28)          | 64.9 (0.81)          | 1.5 (0.01)         |

**Table S12. Water quality parameters for Plant 2.**

| <b>Date</b>               | <b>Sample</b> | <b>Sucralose<br/>(ug/L)</b> | <b>TOC<br/>(mg/L)</b> | <b>UV<sub>254</sub><br/>(abs/cm)</b> | <b>SUVA<br/>(L/mg-m)</b> | <b>Total Ammonia<br/>(mg/L)</b> | <b>Br-<br/>(µg/L)</b> | <b>I-<br/>(µg/L)</b> |
|---------------------------|---------------|-----------------------------|-----------------------|--------------------------------------|--------------------------|---------------------------------|-----------------------|----------------------|
| <b>December<br/>2017</b>  | Raw           | 0.79                        | 4.7                   | 0.074                                | 1.6                      | ND                              | 160                   | 28                   |
|                           | Effluent      | ND                          | 1.3                   | 0.010                                | 0.8                      | --                              | --                    | --                   |
|                           | Dist. Avg.    | ND                          | --                    | --                                   | --                       | --                              | --                    | --                   |
|                           | Dist. Max.    | ND                          | --                    | --                                   | --                       | --                              | --                    | --                   |
| <b>February<br/>2019</b>  | Raw           | 1.06                        | 3.2                   | 0.064                                | 2.0                      | ND                              | 334                   | < 10                 |
|                           | Effluent      | --                          | 1.0                   | 0.008                                | 0.8                      | --                              | --                    | --                   |
|                           | Dist. Avg.    | --                          | --                    | --                                   | --                       | --                              | --                    | --                   |
|                           | Dist. Max.    | --                          | --                    | --                                   | --                       | --                              | --                    | --                   |
| <b>September<br/>2019</b> | Raw           | 0.60                        | 3.7                   | 0.014                                | 0.4                      | ND                              | 145                   | < 10                 |
|                           | Effluent      | --                          | 0.9                   | < 0.004                              | < 0.5                    | --                              | --                    | --                   |
|                           | Dist. Avg.    | --                          | --                    | --                                   | --                       | --                              | --                    | --                   |
|                           | Dist. Max.    | --                          | --                    | --                                   | --                       | --                              | --                    | --                   |

**Table S13. Mean unregulated DBP data for Plant 3.**

| Compound    | MRL<br>µg/L | Concentration - µg/L (nM) |                         |                         |
|-------------|-------------|---------------------------|-------------------------|-------------------------|
|             |             | Raw                       | Dist. Avg.<br>June 2018 | Dist. Avg.<br>Jan. 2019 |
| <b>HNMs</b> |             |                           |                         |                         |
| BDCNM       | 0.1         | ND                        | 1.0 (5.0)               | 0.3 (1.4)               |
| DBCNM       | 0.1         | ND                        | 2.6 (10.2)              | 0.6 (2.4)               |
| TBNM        | 0.5         | ND                        | 2.6 (8.8)               | 0.7 (2.4)               |
| DCNM        | 0.1         | ND                        | ND                      | ND                      |
| BCNM        | 0.1         | ND                        | < 0.1                   | < 0.1                   |
| DBNM        | 0.1         | ND                        | < 0.1                   | 0.1 (0.5)               |
| TCNM        | 0.1         | ND                        | < 0.1                   | 0.1 (0.6)               |
| <b>HALs</b> |             |                           |                         |                         |
| TCAL        | 0.1         | ND                        | < 0.1                   | 0.1 (0.7)               |
| BDCAL       | 0.1         | ND                        | 0.4 (2.0)               | ND                      |
| DBCAL       | 0.1         | ND                        | 0.7 (3.1)               | 0.6 (2.5)               |
| TBAL        | 0.1         | ND                        | 0.4 (1.5)               | 0.4 (1.4)               |
| CAL         | 0.1         | ND                        | ND                      | ND                      |
| DCAL        | 0.1         | ND                        | < 0.1                   | < 0.1                   |
| BAL         | 0.1         | ND                        | ND                      | ND                      |
| BCAL        | 0.1         | ND                        | 0.1 (0.6)               | 0.2 (1.3)               |
| IAL         | 0.1         | ND                        | ND                      | ND                      |
| DBAL        | 0.1         | ND                        | 0.2 (1.0)               | < 0.1                   |
| <b>HANs</b> |             |                           |                         |                         |
| DCAN        | 0.1         | ND                        | 0.2 (2.1)               | 0.3 (2.7)               |
| BCAN        | 0.1         | ND                        | 0.7 (4.4)               | 0.5 (3.2)               |
| TBAN        | 0.1         | ND                        | 0.4 (1.6)               | 0.2 (0.7)               |
| TCAN        | 0.1         | ND                        | ND                      | ND                      |
| CAN         | 0.25        | ND                        | 1.4 (19.0)              | ND                      |
| BAN         | 0.5         | ND                        | ND                      | ND                      |
| DBAN        | 0.1         | ND                        | 0.8 (3.9)               | 1.1 (5.5)               |
| IAN         | 0.1         | ND                        | ND                      | ND                      |
| BDCAN       | 0.1         | ND                        | NM                      | ND                      |
| DBCAN       | 0.1         | ND                        | NM                      | ND                      |
| <b>HKs</b>  |             |                           |                         |                         |
| 1,1-DCP     | 0.1         | ND                        | ND                      | ND                      |
| CP          | 0.1         | ND                        | 1.4 (15.6)              | ND                      |
| 1,1,1-TCP   | 0.1         | ND                        | < 0.1                   | 0.1 (0.6)               |
| 1,1-DBP     | 0.1         | ND                        | 0.3 (1.5)               | 0.5 (2.3)               |
| 1-B-1,1-DCP | 0.1         | ND                        | 0.1 (0.6)               | < 0.1                   |
| 1,3-DCP     | 0.1         | ND                        | ND                      | ND                      |

|               |      |    |           |           |
|---------------|------|----|-----------|-----------|
| 1,1,3-TCP     | 0.1  | ND | ND        | ND        |
| 1,1,3,3-TeCP  | 0.1  | ND | 0.1 (0.6) | ND        |
| 1,1,3,3-TeBP  | 0.1  | ND | 0.5 (1.3) | 0.2 (0.5) |
| <b>I-THMs</b> |      |    |           |           |
| DCIM          | 0.1  | ND | < 0.1     | ND        |
| BCIM          | 0.1  | ND | 0.1 (0.4) | ND        |
| DBIM          | 0.1  | ND | 0.2 (0.6) | < 0.1     |
| CDIM          | 0.1  | ND | ND        | ND        |
| BDIM          | 0.1  | ND | < 0.1     | ND        |
| TIM           | 0.1  | ND | ND        | ND        |
| <b>HAMs</b>   |      |    |           |           |
| CAM           | 1.0  | ND | ND        | ND        |
| BAM           | 1.0  | ND | ND        | ND        |
| IAM           | 1.0  | ND | ND        | ND        |
| BCAM          | 0.2  | ND | 0.7 (3.8) | 0.6 (3.5) |
| TCAM          | 0.1  | ND | < 0.1     | ND        |
| DCAM          | 0.3  | ND | ND        | ND        |
| DBAM          | 0.2  | ND | 1.1 (5.3) | 1.0 (4.6) |
| CIAM          | 0.3  | ND | ND        | ND        |
| BIAM          | 0.5  | ND | ND        | ND        |
| DBCAM         | 0.1  | ND | 0.1 (0.4) | 0.3 (1.2) |
| TBAM          | 0.1  | ND | < 0.1     | ND        |
| DIAM          | 0.1  | ND | ND        | ND        |
| BDCAM         | 0.1  | ND | < 0.1     | ND        |
| <b>IAAs</b>   |      |    |           |           |
| IAA           | .010 | ND | < 0.010   | < 0.010   |
| CIAA          | .025 | ND | ND        | ND        |
| BIAA          | .025 | ND | ND        | ND        |
| DIAA          | .015 | ND | ND        | ND        |



**Table S14. Mean THM4 and HAA9 data for Plant 3.**

| Compound                 | Concentration - µg/L (nM) |                         |                         |                         |
|--------------------------|---------------------------|-------------------------|-------------------------|-------------------------|
|                          | Dist. Avg.<br>June 2018   | Dist. Max.<br>June 2018 | Dist. Avg.<br>Jan. 2019 | Dist. Max.<br>Jan. 2019 |
| <b>THMs</b>              |                           |                         |                         |                         |
| Trichloromethane         | ND                        | 0.6 (5.0)               | 0.8 (6.7)               | 0.7 (5.9)               |
| Bromodichloromethane     | 1.7 (10.4)                | 2.1 (12.8)              | 2.2 (13.4)              | 2.2 (13.4)              |
| Dibromochloromethane     | 4.1 (19.7)                | 4.6 (22.1)              | 5.2 (25.0)              | 5.5 (26.4)              |
| Tribromomethane          | 4.8 (19.0)                | 5.0 (19.8)              | 6.0 (23.7)              | 6.2 (24.5)              |
| <b>HAAs</b>              |                           |                         |                         |                         |
| Chloroacetic acid        | ND                        | ND                      | ND                      | ND                      |
| Bromoacetic acid         | ND                        | ND                      | ND                      | ND                      |
| Dichloroacetic acid      | ND                        | ND                      | ND                      | ND                      |
| Bromochloroacetic acid   | 1.5 (8.7)                 | 1.7 (9.8)               | ND                      | ND                      |
| Dibromoacetic acid       | 3.0 (13.8)                | 3.1 (14.2)              | 1.5 (6.9)               | 1.1 (5.0)               |
| Trichloroacetic acid     | ND                        | ND                      | ND                      | ND                      |
| Bromodichloroacetic acid | ND                        | ND                      | ND                      | ND                      |
| Chlorodibromoacetic acid | ND                        | ND                      | ND                      | ND                      |
| Tribromoacetic acid      | ND                        | ND                      | ND                      | ND                      |

**Table S15. Mean total organic halogen data for Plant 3 - µg/L (µM).**

| Date                    | Sample     | TOCl (as Cl-) | TOBr (as Br-) | TOI (as I-) |
|-------------------------|------------|---------------|---------------|-------------|
| <b>June<br/>2018</b>    | Raw        | 25.2 (0.71)   | 10.2 (0.13)   | 5.2 (0.04)  |
|                         | Effluent   | 41.0 (1.15)   | 45.0 (0.56)   | 3.5 (0.03)  |
|                         | Dist. Avg. | 28.5 (0.80)   | 42.0 (0.53)   | 3.9 (0.03)  |
|                         | Dist. Max  | 63.1 (1.78)   | 42.1 (0.53)   | 2.8 (0.02)  |
| <b>January<br/>2019</b> | Raw        | 21.3 (0.60)   | 10.4 (0.13)   | 2.3 (0.02)  |
|                         | Effluent   | 36.3 (1.02)   | 51.0 (0.64)   | 1.0 (0.008) |
|                         | Dist. Avg. | 34.3 (0.97)   | 48.7 (0.61)   | 1.3 (0.01)  |
|                         | Dist. Max. | 37.1 (1.05)   | 47.9 (0.60)   | 1.4 (0.01)  |

**Table S16. Water quality parameters for Plant 3.**

| <b>Date</b>             | <b>Sample</b> | <b>Sucralose<br/>(µg/L)</b> | <b>TOC<br/>(mg/L)</b> | <b>UV<sub>254</sub><br/>(abs/cm)</b> | <b>SUVA<br/>(L/mg-m)</b> | <b>Total Ammonia<br/>(mg/L)</b> | <b>Br-<br/>(µg/L)</b> | <b>I-<br/>(µg/L)</b> |
|-------------------------|---------------|-----------------------------|-----------------------|--------------------------------------|--------------------------|---------------------------------|-----------------------|----------------------|
| <b>June<br/>2018</b>    | Raw           | 0.6                         | 3.0                   | 0.076                                | 2.6                      | ND                              | 159                   | 27                   |
|                         | Effluent      | --                          | 2.2                   | 0.040                                | 1.8                      | --                              | --                    | --                   |
|                         | Dist. Avg.    | --                          | --                    | --                                   |                          | --                              | --                    | --                   |
|                         | Dist. Max.    | --                          | --                    | --                                   |                          | --                              | --                    | --                   |
| <b>January<br/>2019</b> | Raw           | 0.8                         | 2.7                   | 0.062                                | 2.3                      | ND                              | 184                   | < 10                 |
|                         | Effluent      | --                          | 2.0                   | 0.038                                | 1.9                      | --                              | --                    | --                   |
|                         | Dist. Avg.    | --                          | --                    | --                                   |                          | --                              | --                    | --                   |
|                         | Dist. Max.    | --                          | --                    | --                                   |                          | --                              | --                    | --                   |

**Table S17. Mean unregulated DPB data for Plant 4.**

| Compound    | MRL<br>(µg/L) | Concentration - µg/L (nM) |                         |                         |                         |
|-------------|---------------|---------------------------|-------------------------|-------------------------|-------------------------|
|             |               | Raw                       | Dist. Avg.<br>Feb. 2018 | Dist. Avg.<br>Dec. 2018 | Dist. Avg.<br>July 2019 |
| <b>HNMs</b> |               |                           |                         |                         |                         |
| BDCNM       | 0.1           | ND                        | 0.6 (2.9)               | 0.8 (3.8)               | 0.3 (1.3)               |
| DBCNM       | 0.1           | ND                        | 1.0 (3.9)               | 1.5 (5.9)               | 0.3 (1.1)               |
| TBNM        | 0.5           | ND                        | 1.2 (4.0)               | 1.4 (4.7)               | 0.4 (1.2)               |
| DCNM        | 0.1           | ND                        | ND                      | ND                      | ND                      |
| BCNM        | 0.1           | ND                        | ND                      | ND                      | ND                      |
| DBNM        | 0.1           | ND                        | < 0.1                   | < 0.1                   | < 0.1                   |
| TCNM        | 0.1           | ND                        | ND                      | 0.2 (1.2)               | 0.1 (0.6)               |
| <b>HALs</b> |               |                           |                         |                         |                         |
| TCAL        | 0.1           | ND                        | < 0.1                   | 0.1 (0.7)               | < 0.1                   |
| BDCAL       | 0.1           | ND                        | ND                      | < 0.1                   | < 0.1                   |
| DBCAL       | 0.1           | ND                        | < 0.1                   | < 0.1                   | < 0.1                   |
| TBAL        | 0.1           | ND                        | < 0.1                   | < 0.1                   | < 0.1                   |
| CAL         | 0.1           | ND                        | ND                      | ND                      | ND                      |
| DCAL        | 0.1           | ND                        | < 0.1                   | 0.1 (0.9)               | < 0.1                   |
| BAL         | 0.1           | ND                        | ND                      | ND                      | ND                      |
| BCAL        | 0.1           | ND                        | < 0.1                   | ND                      | ND                      |
| IAL         | 0.1           | ND                        | ND                      | ND                      | ND                      |
| DBAL        | 0.1           | ND                        | ND                      | ND                      | ND                      |
| <b>HANs</b> |               |                           |                         |                         |                         |
| DCAN        | 0.1           | ND                        | 0.2 (1.8)               | 0.4 (3.6)               | 0.1 (0.9)               |
| BCAN        | 0.1           | ND                        | 0.3 (1.9)               | 0.5 (3.2)               | 0.4 (2.4)               |
| TBAN        | 0.1           | ND                        | ND                      | ND                      | ND                      |
| TCAN        | 0.1           | ND                        | ND                      | ND                      | < 0.1                   |
| CAN         | 0.25          | ND                        | 0.3 (4.0)               | ND                      | 1.2 (16.0)              |
| BAN         | 0.1           | ND                        | ND                      | ND                      | ND                      |
| DBAN        | 0.1           | ND                        | 0.3 (1.5)               | 0.3 (1.5)               | 0.1 (0.7)               |
| IAN         | 0.1           | ND                        | ND                      | ND                      | < 0.1                   |
| BDCAN       | 0.1           | ND                        | NM                      | NM                      | ND                      |
| DBCAN       | 0.1           | ND                        | NM                      | NM                      | ND                      |
| <b>HKs</b>  |               |                           |                         |                         |                         |
| 1,1-DCP     | 0.1           | ND                        | ND                      | ND                      | ND                      |
| CP          | 0.1           | ND                        | 1.5 (16.2)              | ND                      | 0.3 (3.1)               |
| 1,1,1-TCP   | 0.1           | ND                        | < 0.1                   | ND                      | ND                      |
| 1,1-DBP     | 0.1           | ND                        | 0.3 (1.4)               | 0.2 (0.9)               | 0.4 (1.9)               |
| 1-B-1,1-DCP | 0.1           | ND                        | ND                      | ND                      | < 0.1                   |

|               |      |    |              |             |             |
|---------------|------|----|--------------|-------------|-------------|
| 1,3-DCP       | 0.1  | ND | ND           | 0.7 (5.5)   | ND          |
| 1,1,3-TCP     | 0.1  | ND | ND           | ND          | ND          |
| 1,1,3,3-TeCP  | 0.1  | ND | 0.8 (4.1)    | ND          | 0.3 (1.3)   |
| 1,1,3,3-TeBP  | 0.1  | ND | 1.0 (2.7)    | 0.4 (1.1)   | 0.5 (1.2)   |
| <b>I-THMs</b> |      |    |              |             |             |
| DCIM          | 0.1  | ND | 1.1 (5.2)    | 1.0 (4.7)   | 1.1 (5.0)   |
| BCIM          | 0.1  | ND | 0.6 (2.4)    | 0.6 (2.4)   | 0.4 (1.5)   |
| DBIM          | 0.1  | ND | 0.2 (0.7)    | 0.1 (0.3)   | 0.1 (0.4)   |
| CDIM          | 0.1  | ND | 0.3 (1.0)    | 0.7 (2.3)   | 0.2 (0.7)   |
| BDIM          | 0.1  | ND | < 0.1        | 0.1 (0.3)   | < 0.1       |
| TIM           | 0.1  | ND | < 0.3        | 0.2 (0.5)   | < 0.1       |
| <b>HAMs</b>   |      |    |              |             |             |
| CAM           | 1.0  | ND | ND           | ND          | ND          |
| BAM           | 1.0  | ND | ND           | ND          | ND          |
| IAM           | 1.0  | ND | ND           | ND          | ND          |
| BCAM          | 0.2  | ND | 1.7 (9.9)    | 1.7 (9.9)   | 1.3 (7.7)   |
| TCAM          | 0.1  | ND | ND           | ND          | ND          |
| DCAM          | 0.3  | ND | 2.9 (22.3)   | 4.1 (32.0)  | 2.3 (17.9)  |
| DBAM          | 0.2  | ND | 1.1 (5.1)    | 0.9 (4.2)   | 0.8 (3.6)   |
| CIAM          | 0.2  | ND | ND           | ND          | 0.2 (0.7)   |
| BIAM          | 0.5  | ND | ND           | ND          | ND          |
| DBCAM         | 0.1  | ND | ND           | ND          | ND          |
| TBAM          | 0.1  | ND | ND           | ND          | ND          |
| DIAM          | 0.1  | ND | ND           | ND          | ND          |
| BDCAM         | 0.1  | ND | < 0.25       | < 0.1       | < 0.1       |
| <b>IAs</b>    |      |    |              |             |             |
| IAA           | .010 | ND | 0.099 (0.5)  | 0.128 (0.7) | 0.051 (0.3) |
| CIAA          | .025 | ND | 0.430 (2.0)  | 0.440 (2.0) | 0.152 (0.7) |
| BIAA          | .025 | ND | 0.072 (0.3)  | 0.052 (0.2) | 0.059 (0.2) |
| DIAA          | .015 | ND | 0.025 (0.08) | 0.030 (0.1) | ND          |

**Table S18. Mean THM4 and HAA9 data for Plant 4.**

| Compound                 | Concentration - µg/L (nM) |                         |                         |                         |                         |                         |
|--------------------------|---------------------------|-------------------------|-------------------------|-------------------------|-------------------------|-------------------------|
|                          | Dist. Avg.<br>Feb. 2018   | Dist. Max.<br>Feb. 2018 | Dist. Avg.<br>Dec. 2018 | Dist. Max.<br>Dec. 2018 | Dist. Avg.<br>July 2019 | Dist. Max.<br>July 2019 |
| <b>THMs</b>              |                           |                         |                         |                         |                         |                         |
| Trichloromethane         | 12 (99.9)                 | 11 (92.1)               | 15 (126)                | 17 (142)                | 19 (159)                | 18 (151)                |
| Bromodichloromethane     | 12 (73.0)                 | 10 (61.0)               | 10 (61.0)               | 7.2 (43.9)              | 14 (85.5)               | 13 (79.4)               |
| Dibromochloromethane     | 9.1 (43.3)                | 7.6 (36.5)              | 4.4 (21.1)              | 2.8 (13.4)              | 8.7 (41.8)              | 8.2 (39.4)              |
| Tribromomethane          | 1.5 (6.1)                 | 1.4 (5.5)               | ND                      | ND                      | 1.0 (4.0)               | 1.0 (4.0)               |
| <b>HAAs</b>              |                           |                         |                         |                         |                         |                         |
| Chloroacetic acid        | 0.9 (9.0)                 | 0.9 (9.5)               | ND                      | ND                      | ND                      | ND                      |
| Bromoacetic acid         | 0.5 (3.4)                 | 0.4 (2.9)               | ND                      | ND                      | ND                      | ND                      |
| Dichloroacetic acid      | 11 (84.6)                 | 11 (85.3)               | 10 (77.6)               | 14 (109)                | 11 (85.3)               | 14 (109)                |
| Bromochloroacetic acid   | 5.4 (30.9)                | 5.3 (30.6)              | 3.6 (20.8)              | 3.7 (21.3)              | 4.5 (26.1)              | 5.9 (34.0)              |
| Dibromoacetic acid       | 2.9 (13.2)                | 2.9 (13.3)              | ND                      | ND                      | 1.8 (8.2)               | 2.3 (10.6)              |
| Trichloroacetic acid     | 2.3 (14.2)                | 1.9 (11.6)              | 3.3 (20.2)              | 2.5 (15.3)              | 3.7 (22.5)              | 3.5 (21.4)              |
| Bromodichloroacetic acid | 2.5 (12.2)                | 1.9 (9.1)               | 2.0 (9.6)               | 1.2 (5.8)               | 2.7 (12.8)              | 2.5 (12.0)              |
| Chlorodibromoacetic acid | 1.9 (7.5)                 | 1.3 (5.2)               | ND                      | ND                      | 1.2 (4.8)               | 1.1 (4.4)               |
| Tribromoacetic acid      | 0.13 (0.4)                | ND                      | ND                      | ND                      | ND                      | ND                      |

**Table S19. Mean total organic halogen data for Plant 4 - µg/L (µM).**

| <b>Date</b>              | <b>Sample</b> | <b>TOCl (as Cl-)</b> | <b>TOBr (as Br-)</b> | <b>TOI (as I-)</b> |
|--------------------------|---------------|----------------------|----------------------|--------------------|
| <b>February<br/>2018</b> | Raw           | 18.5 (0.52)          | 7.2 (0.09)           | 4.0 (0.03)         |
|                          | Effluent      | 73.6 (2.07)          | 43.4 (0.54)          | 3.0 (0.02)         |
|                          | Dist. Avg.    | 72.4 (2.04)          | 44.5 (0.56)          | 4.7 (0.04)         |
|                          | Dist. Max     | 71.2 (2.01)          | 42.1 (0.53)          | 3.3 (0.03)         |
| <b>December<br/>2018</b> | Raw           | 6.7 (0.19)           | 8.3 (0.10)           | 4.9 (0.04)         |
|                          | Effluent      | 73.4 (2.07)          | 46.9 (0.59)          | 3.3 (0.03)         |
|                          | Dist. Avg.    | 65.5 (1.85)          | 43.3 (0.54)          | 3.5 (0.03)         |
|                          | Dist. Max.    | 67.9 (1.91)          | 23.1 (0.29)          | 3.5 (0.03)         |
| <b>July<br/>2019</b>     | Raw           | 11.1 (0.31)          | 10.3 (0.13)          | 4.2 (0.03)         |
|                          | Effluent      | 91.8 (2.59)          | 39.4 (0.49)          | 2.3 (0.02)         |
|                          | Dist. Avg.    | 63.4 (1.79)          | 35.0 (0.44)          | 2.0 (0.02)         |
|                          | Dist. Max     | 69.5 (1.96)          | 53.7 (0.67)          | 2.3 (0.02)         |

**Table S20. Water quality parameters for Plant 4.**

| <b>Date</b>              | <b>Sample</b> | <b>Sucralose<br/>(µg/L)</b> | <b>TOC<br/>(mg/L)</b> | <b>UV<sub>254</sub><br/>(abs/cm)</b> | <b>SUVA<br/>(L/mg-m)</b> | <b>Total Ammonia<br/>(mg/L)</b> | <b>Br-<br/>(µg/L)</b> | <b>I-<br/>(µg/L)</b> |
|--------------------------|---------------|-----------------------------|-----------------------|--------------------------------------|--------------------------|---------------------------------|-----------------------|----------------------|
| <b>February<br/>2018</b> | Raw           | ND                          | 4.0                   | 0.067                                | 1.7                      | ND                              | 146                   | 32                   |
|                          | Effluent      | --                          | 2.9                   | 0.051                                | 1.7                      | --                              | --                    | --                   |
|                          | Dist. Avg.    | --                          | --                    | --                                   | --                       | --                              | --                    | --                   |
|                          | Dist. Max.    | --                          | --                    | --                                   | --                       | --                              | --                    | --                   |
| <b>December<br/>2018</b> | Raw           | ND                          | 4.3                   | 0.107                                | 2.5                      | 0.1                             | 120                   | 22                   |
|                          | Effluent      | --                          | 3.4                   | 0.067                                | 2.0                      | --                              | --                    | --                   |
|                          | Dist. Avg.    | --                          | --                    | --                                   | --                       | --                              | --                    | --                   |
|                          | Dist. Max.    | --                          | --                    | --                                   | --                       | --                              | --                    | --                   |
| <b>July<br/>2019</b>     | Raw           | < 0.2                       | 4.2                   | 0.082                                | 2.0                      | 0.03                            | 126                   | < 10                 |
|                          | Effluent      | --                          | 3.0                   | 0.054                                | 1.8                      | --                              | --                    | --                   |
|                          | Dist. Avg.    | --                          | --                    | --                                   | --                       | --                              | --                    | --                   |
|                          | Dist. Max.    | --                          | --                    | --                                   | --                       | --                              | --                    | --                   |

**Table S21. Mean unregulated DBP data for Plant 5.**

| Compound    | MRL<br>( $\mu\text{g/L}$ ) | Concentration - $\mu\text{g/L}$ (nM) |                         |                         |
|-------------|----------------------------|--------------------------------------|-------------------------|-------------------------|
|             |                            | Raw                                  | Dist. Avg.<br>Oct. 2017 | Dist. Avg.<br>July 2018 |
| <b>HNMs</b> |                            |                                      |                         |                         |
| BDCNM       | 0.1                        | ND                                   | 0.4 (1.9)               | 0.3 (1.4)               |
| DBCNM       | 0.1                        | ND                                   | 0.7 (2.8)               | 0.5 (2.0)               |
| TBNM        | 0.5                        | ND                                   | ND                      | < 0.5                   |
| DCNM        | 0.1                        | ND                                   | ND                      | ND                      |
| BCNM        | 0.1                        | ND                                   | 0.2 (1.1)               | < 0.1                   |
| DBNM        | 0.1                        | ND                                   | < 0.1                   | < 0.1                   |
| TCNM        | 0.1                        | ND                                   | 0.3 (1.8)               | 0.1 (0.6)               |
| <b>HALs</b> |                            |                                      |                         |                         |
| TCAL        | 0.1                        | ND                                   | 1.9 (12.9)              | 3.1 (21.0)              |
| BDCAL       | 0.1                        | ND                                   | 0.8 (4.2)               | 2.2 (11.5)              |
| DBCAL       | 0.1                        | ND                                   | 0.2 (0.8)               | 0.4 (1.7)               |
| TBAL        | 0.1                        | ND                                   | < 0.1                   | < 0.1                   |
| CAL         | 0.1                        | ND                                   | ND                      | ND                      |
| DCAL        | 0.1                        | ND                                   | < 0.1                   | 0.1 (0.9)               |
| BAL         | 0.1                        | ND                                   | ND                      | ND                      |
| BCAL        | 0.1                        | ND                                   | < 0.1                   | 0.2 (1.3)               |
| IAL         | 0.1                        | ND                                   | ND                      | ND                      |
| DBAL        | 0.1                        | ND                                   | ND                      | ND                      |
| <b>HANs</b> |                            |                                      |                         |                         |
| DCAN        | 0.1                        | ND                                   | 0.6 (5.5)               | 1.1 (10.0)              |
| BCAN        | 0.1                        | ND                                   | 1.0 (3.2)               | 1.1 (7.1)               |
| TBAN        | 0.1                        | ND                                   | 0.5 (1.8)               | 0.4 (1.4)               |
| TCAN        | 0.1                        | ND                                   | ND                      | < 0.1                   |
| CAN         | 0.25                       | ND                                   | 0.3 (4.0)               | 0.4 (5.3)               |
| BAN         | 0.5                        | ND                                   | ND                      | ND                      |
| DBAN        | 0.1                        | ND                                   | 0.3 (1.5)               | 0.5 (2.5)               |
| IAN         | 0.1                        | ND                                   | ND                      | ND                      |
| BDCAN       | 0.1                        | NM                                   | NM                      | NM                      |
| DBCAN       | 0.1                        | NM                                   | NM                      | NM                      |
| <b>HKs</b>  |                            |                                      |                         |                         |
| 1,1-DCP     | 0.1                        | ND                                   | ND                      | 0.4 (3.2)               |
| CP          | 0.1                        | ND                                   | 5.5 (59.4)              | 1.0 (10.8)              |
| 1,1,1-TCP   | 0.1                        | ND                                   | 0.3 (1.9)               | 0.2 (1.2)               |
| 1,1-DBP     | 0.1                        | ND                                   | ND                      | < 0.1                   |
| 1-B-1,1-DCP | 0.1                        | ND                                   | ND                      | 0.1 (0.5)               |
| 1,3-DCP     | 0.1                        | ND                                   | 0.8 (6.3)               | < 0.1                   |



|               |      |    |             |             |
|---------------|------|----|-------------|-------------|
| 1,1,3-TCP     | 0.1  | ND | 0.1 (0.6)   | < 0.1       |
| 1,1,3,3-TeCP  | 0.1  | ND | 0.1 (0.5)   | < 0.1       |
| 1,1,3,3-TeBP  | 0.1  | ND | 0.1 (0.3)   | 0.1 (0.3)   |
| <b>I-THMs</b> |      |    |             |             |
| DCIM          | 0.1  | ND | ND          | 0.1 (0.5)   |
| BCIM          | 0.1  | ND | 0.1 (0.4)   | 0.1 (0.4)   |
| DBIM          | 0.1  | ND | ND          | < 0.1       |
| CDIM          | 0.1  | ND | ND          | ND          |
| BDIM          | 0.1  | ND | ND          | ND          |
| TIM           | 0.1  | ND | ND          | ND          |
| <b>HAMs</b>   |      |    |             |             |
| CAM           | 1.0  | ND | ND          | ND          |
| BAM           | 1.0  | ND | ND          | ND          |
| IAM           | 1.0  | ND | ND          | ND          |
| BCAM          | 0.1  | ND | 1.7 (9.9)   | 2.6 (14.1)  |
| TCAM          | 0.1  | ND | 0.3 (1.8)   | 0.2 (1.2)   |
| DCAM          | 0.3  | ND | 2.7 (21.1)  | 1.8 (14.1)  |
| DBAM          | 0.2  | ND | 0.7 (3.2)   | 1.7 (7.8)   |
| CIAM          | 0.3  | ND | ND          | ND          |
| BIAM          | 0.5  | ND | ND          | ND          |
| DBCAM         | 0.1  | ND | 0.4 (1.6)   | 0.3 (1.2)   |
| TBAM          | 0.1  | ND | ND          | 0.1 (0.3)   |
| DIAM          | 0.2  | ND | ND          | ND          |
| BDCAM         | 0.1  | ND | 0.4 (1.9)   | 0.3 (1.5)   |
| <b>IAs</b>    |      |    |             |             |
| IAA           | .010 | ND | 0.023 (0.1) | < 0.010     |
| CIAA          | .015 | ND | 0.032 (0.1) | 0.120 (0.5) |
| BIAA          | .020 | ND | ND          | < 0.020     |
| DIAA          | .015 | ND | ND          | ND          |

**Table S22. Mean THM4 and HAA9 data for Plant 5.**

| Compound                 | Concentration - µg/L (nM) |                         |                         |                         |
|--------------------------|---------------------------|-------------------------|-------------------------|-------------------------|
|                          | Dist. Avg.<br>Oct. 2017   | Dist. Max.<br>Oct. 2017 | Dist. Avg.<br>July 2018 | Dist. Max.<br>July 2018 |
| <b>THMs</b>              |                           |                         |                         |                         |
| Trichloromethane         | 12 (101)                  | 11 (92.1)               | 12 (101)                | 11 (92.1)               |
| Bromodichloromethane     | 13 (79.4)                 | 12 (73.2)               | 12 (73.2)               | 16 (97.7)               |
| Dibromochloromethane     | 7.3 (35.0)                | 7.3 (35.0)              | 9.0 (43.2)              | 15 (72.0)               |
| Tribromomethane          | 1.4 (5.5)                 | 1.6 (6.3)               | 1.9 (7.5)               | 4.3 (17.0)              |
| <b>HAAs</b>              |                           |                         |                         |                         |
| Chloroacetic acid        | ND                        | ND                      | ND                      | ND                      |
| Bromoacetic acid         | ND                        | ND                      | ND                      | ND                      |
| Dichloroacetic acid      | 7.6 (58.9)                | 9.1 (70.6)              | 8.8 (68.2)              | 10 (77.6)               |
| Bromochloroacetic acid   | 4.8 (27.7)                | 5.7 (32.9)              | 5.0 (28.8)              | 8.5 (49.0)              |
| Dibromoacetic acid       | 1.8 (8.3)                 | 2.3 (10.6)              | 2.5 (11.5)              | 4.9 (22.5)              |
| Trichloroacetic acid     | 4.8 (29.4)                | 5.5 (33.7)              | 4.6 (28.2)              | 6.5 (39.8)              |
| Bromodichloroacetic acid | 5.9 (28.4)                | 3.3 (15.9)              | 2.9 (14.0)              | 5.7 (27.4)              |
| Chlorodibromoacetic acid | 1.8 (7.1)                 | ND                      | ND                      | 3.0 (11.9)              |
| Tribromoacetic acid      | ND                        | ND                      | ND                      | ND                      |

**Table S23. Mean total organic halogen data for Plant 5 -µg/L (µM).**

| Date                    | Sample     | TOCl (as Cl-) | TOBr (as Br-) | TOI (as I-) |
|-------------------------|------------|---------------|---------------|-------------|
| <b>October<br/>2017</b> | Raw        | 26.1 (0.74)   | 10.0 (0.13)   | 1.6 (0.01)  |
|                         | Effluent   | 93.3 (2.63)   | 45.2 (0.57)   | 0.8 (0.006) |
|                         | Dist. Avg. | 63.5 (1.79)   | 36.1 (0.45)   | 0.6 (0.005) |
|                         | Dist. Max  | 57.7 (1.63)   | 30.9 (0.39)   | 0.5 (0.004) |
| <b>July<br/>2018</b>    | Raw        | 20.9 (0.59)   | 9.1 (0.11)    | 3.9 (0.03)  |
|                         | Effluent   | 84.3 (2.37)   | 77.6 (0.97)   | 2.4 (0.02)  |
|                         | Dist. Avg. | 90.8 (2.56)   | 65.8 (0.82)   | 2.5 (0.02)  |
|                         | Dist. Max. | 70.8 (1.99)   | 37.7 (0.47)   | 1.9 (0.01)  |

**Table S24. Water quality parameters for Plant 5.**

| <b>Date</b>             | <b>Sample</b> | <b>Sucralose<br/>(µg/L)</b> | <b>TOC<br/>(mg/L)</b> | <b>UV<sub>254</sub><br/>(abs/cm)</b> | <b>SUVA<br/>(L/mg-m)</b> | <b>Total Ammonia<br/>(mg/L)</b> | <b>Br-<br/>(µg/L)</b> | <b>I-<br/>(µg/L)</b> |
|-------------------------|---------------|-----------------------------|-----------------------|--------------------------------------|--------------------------|---------------------------------|-----------------------|----------------------|
| <b>October<br/>2017</b> | Raw           | 2.8                         | 3.6                   | 0.056                                | 1.5                      | 0.17                            | 92                    | 11                   |
|                         | Effluent      | 1.2                         | 1.8                   | 0.035                                | 1.9                      | --                              | --                    | --                   |
|                         | Dist. Avg.    | 1.1                         | --                    | --                                   | --                       | --                              | --                    | --                   |
|                         | Dist. Max.    | 0.9                         | --                    | --                                   | --                       | --                              | --                    | --                   |
| <b>July<br/>2018</b>    | Raw           | 8.0                         | 5.1                   | 0.072                                | 1.4                      | 0.05                            | 174                   | < 10                 |
|                         | Effluent      | 3.1                         | 3.2                   | 0.044                                | 1.4                      | --                              | --                    | --                   |
|                         | Dist. Avg.    | 2.6                         | --                    | --                                   | --                       | --                              | --                    | --                   |
|                         | Dist. Max.    | 1.2                         | --                    | --                                   | --                       | --                              | --                    | --                   |

**Table S25. Mean unregulated DBP data for Plant 6.**

| Compound    | MRL<br>µg/L | Concentration - µg/L (nM) |          |                         |                         |                         |
|-------------|-------------|---------------------------|----------|-------------------------|-------------------------|-------------------------|
|             |             | Raw<br>A                  | Raw<br>B | Dist. Avg.<br>Jan. 2018 | Dist. Avg.<br>Aug. 2018 | Dist. Avg.<br>Sep. 2019 |
| <b>HNMs</b> |             |                           |          |                         |                         |                         |
| BDCNM       | 0.1         | ND                        | ND       | 0.3 (1.4)               | 0.7 (3.4)               | 0.2 (1.0)               |
| DBCNM       | 0.1         | ND                        | ND       | 0.6 (2.4)               | 1.4 (5.4)               | 0.4 (1.6)               |
| TBNM        | 0.25        | ND                        | ND       | ND                      | 1.5 (4.9)               | 0.5 (1.7)               |
| DCNM        | 0.1         | ND                        | ND       | ND                      | ND                      | ND                      |
| BCNM        | 0.1         | ND                        | ND       | 0.1 (0.6)               | ND                      | ND                      |
| DBNM        | 0.1         | ND                        | ND       | 0.2 (0.9)               | < 0.1                   | < 0.1                   |
| TCNM        | 0.1         | ND                        | ND       | 0.1 (0.6)               | 0.2 (1.0)               | < 0.1                   |
| <b>HALs</b> |             |                           |          |                         |                         |                         |
| TCAL        | 0.1         | ND                        | ND       | 0.1 (0.7)               | 0.2 (1.4)               | 0.3 (2.0)               |
| BDCAL       | 0.1         | ND                        | ND       | ND                      | 0.7 (3.8)               | 0.6 (3.1)               |
| DBCAL       | 0.1         | ND                        | ND       | 1.1 (4.7)               | 0.4 (1.6)               | 0.5 (2.1)               |
| TBAL        | 0.1         | ND                        | ND       | 0.2 (0.7)               | 0.1 (0.3)               | 0.1 (0.4)               |
| CAL         | 0.1         | ND                        | ND       | ND                      | ND                      | ND                      |
| DCAL        | 0.1         | ND                        | ND       | ND                      | 0.1 (0.9)               | < 0.1                   |
| BAL         | 0.1         | ND                        | ND       | ND                      | ND                      | ND                      |
| BCAL        | 0.1         | ND                        | ND       | 0.1 (0.6)               | 0.1 (0.6)               | 0.3 (1.9)               |
| IAL         | 0.1         | ND                        | ND       | ND                      | ND                      | ND                      |
| DBAL        | 0.1         | ND                        | ND       | ND                      | ND                      | < 0.1                   |
| <b>HANs</b> |             |                           |          |                         |                         |                         |
| DCAN        | 0.1         | ND                        | ND       | 0.7 (6.4)               | 0.6 (5.5)               | 0.4 (3.6)               |
| BCAN        | 0.1         | ND                        | ND       | 1.3 (8.4)               | 1.4 (8.8)               | 1.2 (7.8)               |
| TBAN        | 0.1         | ND                        | ND       | 0.5 (1.8)               | 0.6 (2.2)               | 0.3 (1.1)               |
| TCAN        | 0.1         | ND                        | ND       | ND                      | < 0.1                   | ND                      |
| CAN         | 0.1         | ND                        | ND       | ND                      | 0.8 (10.8)              | ND                      |
| BAN         | 0.1         | ND                        | ND       | ND                      | ND                      | ND                      |
| DBAN        | 0.25        | ND                        | ND       | 1.2 (6.0)               | 1.1 (5.8)               | 1.7 (8.5)               |
| IAN         | 0.5         | ND                        | ND       | ND                      | ND                      | ND                      |
| BDCAN       | 0.1         | ND                        | ND       | NM                      | NM                      | ND                      |
| DBCAN       | 0.1         | ND                        | ND       | NM                      | NM                      | 0.1 (0.4)               |
| <b>HKs</b>  |             |                           |          |                         |                         |                         |
| 1,1-DCP     | 0.1         | ND                        | ND       | 0.3 (2.4)               | 0.3 (2.7)               | 0.2 (1.6)               |
| CP          | 0.1         | ND                        | ND       | 5.9 (63.8)              | 0.9 (10.0)              | 0.7 (7.6)               |
| 1,1,1-TCP   | 0.1         | ND                        | ND       | 0.2 (1.2)               | < 0.1                   | < 0.1                   |
| 1,1-DBP     | 0.1         | ND                        | ND       | 0.1 (0.5)               | < 0.1                   | < 0.1                   |
| 1-B-1,1-DCP | 0.1         | ND                        | ND       | 0.2 (1.0)               | 0.2 (0.7)               | ND                      |
| 1,3-DCP     | 0.1         | ND                        | ND       | 0.1 (0.8)               | ND                      | ND                      |

|               |      |    |    |             |             |             |
|---------------|------|----|----|-------------|-------------|-------------|
| 1,1,3-TCP     | 0.1  | ND | ND | ND          | ND          | ND          |
| 1,1,3,3-TeCP  | 0.1  | ND | ND | 0.1 (0.5)   | < 0.1       | < 0.1       |
| 1,1,3,3-TeBP  | 0.1  | ND | ND | ND          | < 0.1       | 0.2 (0.5)   |
| <b>I-THMs</b> |      |    |    |             |             |             |
| DCIM          | 0.1  | ND | ND | 0.2 (0.9)   | 0.3 (1.6)   | 0.1 (0.5)   |
| BCIM          | 0.1  | ND | ND | 0.3 (1.2)   | 0.2 (0.9)   | 0.1 (0.5)   |
| DBIM          | 0.1  | ND | ND | 0.1 (0.3)   | 0.1 (0.3)   | < 0.1       |
| CDIM          | 0.1  | ND | ND | ND          | ND          | ND          |
| BDIM          | 0.1  | ND | ND | ND          | ND          | ND          |
| TIM           | 0.1  | ND | ND | ND          | ND          | ND          |
| <b>HAMs</b>   |      |    |    |             |             |             |
| CAM           | 1.0  | ND | ND | ND          | ND          | ND          |
| BAM           | 1.0  | ND | ND | ND          | ND          | ND          |
| IAM           | 1.0  | ND | ND | ND          | ND          | ND          |
| BCAM          | 0.3  | ND | ND | 0.6 (3.5)   | 0.9 (4.5)   | 0.6 (3.5)   |
| TCAM          | 0.2  | ND | ND | 0.2 (1.2)   | < 0.2       | ND          |
| DCAM          | 0.3  | ND | ND | ND          | ND          | 0.6 (4.7)   |
| DBAM          | 0.2  | ND | ND | 1.6 (7.4)   | 0.9 (4.3)   | 1.0 (4.6)   |
| CIAM          | 0.3  | ND | ND | ND          | ND          | ND          |
| BIAM          | 0.5  | ND | ND | ND          | ND          | ND          |
| DBCAM         | 0.1  | ND | ND | ND          | ND          | 0.1         |
| TBAM          | 0.1  | ND | ND | ND          | 0.1 (0.5)   | < 0.1       |
| DIAM          | 0.1  | ND | ND | ND          | ND          | ND          |
| BDCAM         | 0.1  | ND | ND | ND          | 0.2 (0.9)   | < 0.1       |
| <b>IAs</b>    |      |    |    |             |             |             |
| IAA           | .025 | ND | ND | 0.032 (0.2) | < 0.010     | 0.054 (0.3) |
| CIAA          | .050 | ND | ND | 0.026 (0.1) | 0.111 (0.5) | 0.153 (0.7) |
| BIAA          | .020 | ND | ND | < 0.020     | < 0.020     | 0.058 (0.2) |
| DIAA          | .025 | ND | ND | ND          | ND          | ND          |

**Table S26. Mean THM4 and HAA9 data for Plant 6.**

| Compound                 | Concentration - µg/L (nM) |                         |                         |                         |                         |                         |
|--------------------------|---------------------------|-------------------------|-------------------------|-------------------------|-------------------------|-------------------------|
|                          | Dist. Avg.<br>Jan. 2018   | Dist. Max.<br>Jan. 2018 | Dist. Avg.<br>Aug. 2018 | Dist. Max.<br>Aug. 2018 | Dist. Avg.<br>Sep. 2019 | Dist. Max.<br>Sep. 2019 |
| <b>THMs</b>              |                           |                         |                         |                         |                         |                         |
| Trichloromethane         | 3.6 (30.5)                | 3.8 (31.8)              | 4.8 (40.2)              | 3.9 (32.7)              | 2.8 (23.5)              | 3.8 (31.8)              |
| Bromodichloromethane     | 7.6 (46.2)                | 7.6 (46.4)              | 8.0 (48.8)              | 7.0 (42.7)              | 5.5 (33.6)              | 6.1 (37.2)              |
| Dibromochloromethane     | 9.0 (43.4)                | 9.1 (43.7)              | 8.7 (41.8)              | 8.0 (38.4)              | 8.4 (40.3)              | 8.6 (41.3)              |
| Tribromomethane          | 3.7 (14.4)                | 3.9 (15.4)              | 2.8 (11.1)              | 2.6 (10.3)              | 3.8 (15.0)              | 3.7 (14.6)              |
| <b>HAAs</b>              |                           |                         |                         |                         |                         |                         |
| Chloroacetic acid        | ND                        | 0.4 (4.2)               | ND                      | ND                      | ND                      | ND                      |
| Bromoacetic acid         | 0.6 (4.0)                 | 0.5 (3.6)               | ND                      | ND                      | ND                      | ND                      |
| Dichloroacetic acid      | 2.3 (18.1)                | 2.4 (18.6)              | 1.9 (14.7)              | 2.0 (15.5)              | 1.9 (14.7)              | 4.0 (31.0)              |
| Bromochloroacetic acid   | 2.8 (15.9)                | 2.8 (16.1)              | 2.3 (13.3)              | 2.1 (12.1)              | 3.2 (18.5)              | 4.3 (24.8)              |
| Dibromoacetic acid       | 2.2 (10.1)                | 2.2 (10.1)              | 1.9 (8.7)               | 1.7 (7.8)               | 3.2 (14.7)              | 4.0 (18.4)              |
| Trichloroacetic acid     | 0.9 (5.8)                 | 0.9 (5.5)               | ND                      | ND                      | ND                      | 1.2 (7.3)               |
| Bromodichloroacetic acid | 2.0 (9.7)                 | 2.1 (10.1)              | 1.3 (6.3)               | ND                      | 2.0 (9.6)               | 2.3 (11.1)              |
| Chlorodibromoacetic acid | 2.0 (7.9)                 | 2.0 (7.9)               | 1.0 (4.0)               | ND                      | 2.8 (11.1)              | 2.8 (11.1)              |
| Tribromoacetic acid      | 0.5 (1.7)                 | 0.5 (1.7)               | ND                      | ND                      | ND                      | ND                      |

**Table S27. Mean total organic halogen data for Plant 6 - µg/L (µM).**

| <b>Date</b>               | <b>Sample</b>     | <b>TOCl (as Cl-)</b> | <b>TOBr (as Br-)</b> | <b>TOI (as I-)</b> |
|---------------------------|-------------------|----------------------|----------------------|--------------------|
| <b>January<br/>2018</b>   | Plant 6 A Raw     | 29.8 (0.84)          | 7.6 (0.10)           | 4.0 (0.03)         |
|                           | Plant 6 B Raw     | 15.7 (0.44)          | 7.8 (0.10)           | 1.0 (0.008)        |
|                           | Combined Effluent | 53.8 (1.52)          | 60.9 (0.76)          | 0.8 (0.006)        |
|                           | Dist. Avg.        | 49.6 (1.40)          | 56.8 (0.71)          | 0.9 (0.007)        |
|                           | Dist. Max.        | 89.7 (2.53)          | 53.9 (0.67)          | 0.9 (0.007)        |
| <b>August<br/>2018</b>    | Plant 6 A Raw     | 28.7 (0.81)          | 7.4 (0.09)           | 7.6 (0.06)         |
|                           | Plant 6 B Raw     | 11.2 (0.32)          | 6.8 (0.08)           | 1.9 (0.01)         |
|                           | Combined Effluent | 46.0 (1.30)          | 50.7 (0.63)          | 0.8 (0.006)        |
|                           | Dist. Avg.        | 48.4 (1.36)          | 44.8 (0.56)          | 0.9 (0.007)        |
|                           | Dist. Max.        | 45.1 (1.27)          | 43.8 (0.55)          | 0.9 (0.007)        |
| <b>September<br/>2019</b> | Plant 6 A Raw     | 38.5 (1.08)          | 7.7 (0.10)           | 4.1 (0.03)         |
|                           | Plant 6 B Raw     | 31.6 (0.89)          | 6.1 (0.08)           | 0.9 (0.007)        |
|                           | Combined Effluent | 95.1 (2.70)          | 50.3 (0.63)          | 1.1 (0.008)        |
|                           | Dist. Avg.        | 122.1 (3.44)         | 43.6 (0.55)          | 1.7 (0.01)         |
|                           | Dist. Max.        | 75.1 (2.12)          | 37.8 (0.47)          | 1.4 (0.01)         |

**Table S28. Water quality parameters for Plant 6.**

| <b>Date</b>               | <b>Sample</b>      | <b>Blend</b> | <b>Sucralose<br/>(µg/L)</b> | <b>TOC<br/>(mg/L)</b> | <b>UV<sub>254</sub><br/>(abs/cm<br/>)</b> | <b>SUVA<br/>(L/mg-<br/>m)</b> | <b>Total<br/>Ammonia<br/>(mg/L)</b> | <b>Br-<br/>(µg/L)</b> | <b>I-<br/>(µg/L)</b> |
|---------------------------|--------------------|--------------|-----------------------------|-----------------------|-------------------------------------------|-------------------------------|-------------------------------------|-----------------------|----------------------|
| <b>January<br/>2018</b>   | Plant 6 A Raw      | 36.0 %       | 12.4                        | 2.6                   | 0.046                                     | 1.8                           | ND                                  | 291                   | 22                   |
|                           | Plant 6 A Effluent |              | 2.8                         | 2.1                   | 0.021                                     | 1.0                           | --                                  | --                    | --                   |
|                           | Plant 6 B Raw      | 64.0 %       | 0.2                         | 4.2                   | 0.052                                     | 1.2                           | 0.05                                | 59                    | < 10                 |
|                           | Plant 6 B Effluent |              | 0.2                         | 2.5                   | 0.023                                     | 0.9                           | --                                  | --                    | --                   |
|                           | Dist. Avg.         |              | 1.2                         | --                    | --                                        | --                            | --                                  | --                    | --                   |
|                           | Dist. Max.         |              | 1.0                         | --                    | --                                        | --                            | --                                  | --                    | --                   |
|                           |                    |              |                             |                       |                                           |                               |                                     |                       |                      |
| <b>August<br/>2018</b>    | Plant 6 A Raw      | 31.4%        | 17.8                        | 2.9                   | 0.058                                     | 2.0                           | 0.08                                | 270                   | < 10                 |
|                           | Plant 6 A Effluent |              | 8.4                         | 2.4                   | 0.031                                     | 1.3                           | --                                  | --                    | --                   |
|                           | Plant 6 B Raw      | 68.6 %       | 0.3                         | 3.6                   | 0.047                                     | 1.3                           | 0.09                                | 55                    | < 10                 |
|                           | Plant 6 B Effluent |              | 0.2                         | 2.1                   | 0.021                                     | 1.0                           | --                                  | --                    | --                   |
|                           | Dist. Avg.         |              | 2.4                         | --                    | --                                        | --                            | --                                  | --                    | --                   |
|                           | Dist. Max.         |              | 2.5                         | --                    | --                                        | --                            | --                                  | --                    | --                   |
|                           |                    |              |                             |                       |                                           |                               |                                     |                       |                      |
| <b>September<br/>2019</b> | Plant 6 A Raw      | 41.3 %       | 21                          | 2.8                   | 0.060                                     | 2.1                           | ND                                  | 261                   | < 10                 |
|                           | Plant 6 A Effluent |              | 4.8                         | 1.6                   | 0.021                                     | 1.3                           | --                                  | --                    | --                   |
|                           | Plant 6 B Raw      | 58.7 %       | 0.3                         | 3.0                   | 0.044                                     | 1.5                           | ND                                  | 51                    | < 10                 |
|                           | Plant 6 B Effluent |              | < 0.2                       | 1.7                   | 0.018                                     | 1.1                           | --                                  | --                    | --                   |
|                           | Dist. Avg.         |              | 1.8                         | --                    | --                                        | --                            | --                                  | --                    | --                   |
|                           | Dist. Max.         |              | 1.9                         | --                    | --                                        | --                            | --                                  | --                    | --                   |
|                           |                    |              |                             |                       |                                           |                               |                                     |                       |                      |



**Table S29. Summary of the CHO cell cytotoxicity statistical analyses of the distribution average water samples.**

| Water Sample        | Lowest Cytotoxic Conc. (CF) <sup>a</sup> | Mean LC <sub>50</sub> Value (CF ± SE) <sup>b</sup> | $r^2$ <sup>c</sup> | ANOVA Test Statistic <sup>d</sup>  | Mean CTI Value ± SE <sup>e</sup> |
|---------------------|------------------------------------------|----------------------------------------------------|--------------------|------------------------------------|----------------------------------|
| Plant 1: 5/7/2018   | 40.0                                     | 149.43 ± 6.71                                      | 0.98               | $F_{14,98} = 132.1; P \leq 0.001$  | 6.71 ± 0.12                      |
| Plant 1: 11/6/2018  | 50.0                                     | 176.75 ± 5.68                                      | 0.98               | $F_{14,98} = 150.6; P \leq 0.001$  | 5.68 ± 0.13                      |
| Plant 1: 3/5/2018   | 25.0                                     | 137.41 ± 7.38                                      | 0.98               | $F_{14,95} = 206.4; P \leq 0.001$  | 7.38 ± 0.27                      |
| Plant 2: 12/14/2017 | 25.0                                     | 98.48 ± 10.21                                      | 0.99               | $F_{12,92} = 85.7; P \leq 0.001$   | 10.21 ± 0.26                     |
| Plant 2: 2/20/2019  | 100.0                                    | 131.68 ± 7.64                                      | 0.99               | $F_{10,63} = 85.7; P \leq 0.001$   | 7.64 ± 0.18                      |
| Plant 2: 9/17/2019  | 40.0                                     | 109.90 ± 9.12                                      | 0.97               | $F_{11,99} = 145.2; P \leq 0.001$  | 9.12 ± 0.11                      |
| Plant 3: 6/12/2018  | 40.0                                     | 116.33 ± 8.81                                      | 0.99               | $F_{11,98} = 132.7; P \leq 0.001$  | 8.81 ± 0.43                      |
| Plant 3: 1/28/2019  | 50.0                                     | 128.48 ± 8.01                                      | 0.96               | $F_{10,78} = 69.9; P \leq 0.001$   | 8.01 ± 0.39                      |
| Plant 4: 2/26/2018  | 40.0                                     | 63.79 ± 15.72                                      | 0.99               | $F_{11,99} = 454.1; P \leq 0.001$  | 15.72 ± 0.25                     |
| Plant 4: 12/10/2018 | 50.0                                     | 72.35 ± 14.28                                      | 0.99               | $F_{11,91} = 58.9; P \leq 0.001$   | 14.28 ± 0.75                     |
| Plant 4: 7/15/2019  | 40.0                                     | 123.67 ± 8.32                                      | 0.99               | $F_{10,102} = 96.7; P \leq 0.001$  | 8.32 ± 0.42                      |
| Plant 5: 10/10/2017 | 25.0                                     | 148.01 ± 6.79                                      | 0.99               | $F_{11,97} = 221.6; P \leq 0.001$  | 6.79 ± 0.15                      |
| Plant 5: 7/10/2018  | 20.0                                     | 101.29 ± 9.93                                      | 0.99               | $F_{10,101} = 339.4; P \leq 0.001$ | 9.93 ± 0.24                      |
| Plant 6: 1/9/2018   | 80.0                                     | 152.97 ± 6.57                                      | 0.99               | $F_{12,96} = 190.3; P \leq 0.001$  | 6.57 ± 0.15                      |
| Plant 6: 8/6/2018   | 10.0                                     | 105.25 ± 9.53                                      | 0.98               | $F_{14,97} = 136.8; P \leq 0.001$  | 9.53 ± 0.17                      |
| Plant 6: 9/23/2019  | 40.0                                     | 128.41 ± 8.34                                      | 0.99               | $F_{10,98} = 76.6; P \leq 0.001$   | 8.34 ± 0.64                      |

<sup>a</sup> Lowest cytotoxic concentration was the lowest concentration factor of the sample that induced a statistically significant reduction in cell density as compared to the negative control. <sup>b</sup> The LC<sub>50</sub> value is the concentration factor of the water sample, determined from a regression analysis of the data, that induced a cell density of 50% as compared to the concurrent negative controls. The mean and the standard error (SE) of each LC<sub>50</sub> value were derived from multiple regression analyses using bootstrap statistics. <sup>c</sup> The  $r^2$  is the coefficient of determination for the regression analysis of the concentration-response data upon which the LC<sub>50</sub> value was calculated. <sup>d</sup> The degrees of freedom for the between-groups and residual associated with the calculated  $F$ -test result and the resulting probability value.

<sup>e</sup> The Cytotoxicity Index Value is the  $(LC_{50}^{-1})(10^3)$ . The mean and the standard error (SE) of each CTI value were derived from multiple regression analyses using bootstrap statistics.
